# Supplementary material for: Global research trends of Mycoplasma pneumoniae pneumonia in children: a bibliometric analysis
Source: Front Pediatr. 2023 Nov 24;11:1306234. doi: 10.3389/fped.2023.1306234 (PMC10704248; doi:10.3389/fped.2023.1306234)
Supplement: Supplementary Table S2 — The annual average citations for references. [file Table2.xlsx]

## Sheet: Sheet1
Cited references	Year	Total citations	Average citations
Waites KB, 2017, CLIN MICROBIOL REV, V30, P747, DOI 10.1128/CMR.00114-16	2017	137	19.5714
Kutty PK, 2019, CLIN INFECT DIS, V68, P5, DOI 10.1093/cid/ciy419	2019	57	11.4
Jain S, 2015, NEW ENGL J MED, V372, P835, DOI 10.1056/NEJMoa1405870	2015	91	10.1111
Lee H, 2018, EXPERT REV ANTI-INFE, V16, P23, DOI 10.1080/14787210.2018.1414599	2018	49	8.16667
Tsai TA, 2021, J MICROBIOL IMMUNOL, V54, P557, DOI 10.1016/j.jmii.2020.10.002	2021	23	7.66667
Gao LW, 2019, EPIDEMIOL INFECT, V147, P0, DOI 10.1017/S0950268819000839	2019	32	6.4
Sondergaard MJ, 2018, PLOS ONE, V13, P0, DOI 10.1371/journal.pone.0195288	2018	36	6
Zhang YY, 2016, PLOS ONE, V11, P0, DOI 10.1371/journal.pone.0156465	2016	47	5.875
Yang TI, 2019, J MICROBIOL IMMUNOL, V52, P329, DOI 10.1016/j.jmii.2018.09.009	2019	29	5.8
Chen YC, 2020, EMERG INFECT DIS, V26, P1382, DOI 10.3201/eid2607.200017	2020	22	5.5
Narita M, 2016, FRONT MICROBIOL, V7, P0, DOI 10.3389/fmicb.2016.00023	2016	43	5.375
Sauteur PMM, 2016, FRONT MICROBIOL, V7, P0, DOI 10.3389/fmicb.2016.00329	2016	43	5.375
Zhou YJ, 2020, BMC INFECT DIS, V20, P0, DOI 10.1186/s12879-020-05356-1	2020	21	5.25
Pereyre S, 2016, FRONT MICROBIOL, V7, P0, DOI 10.3389/fmicb.2016.00974	2016	42	5.25
Poddighe D, 2018, CURR OPIN RHEUMATOL, V30, P380, DOI 10.1097/BOR.0000000000000494	2018	31	5.16667
Lee KL, 2021, J FORMOS MED ASSOC, V120, P281, DOI 10.1016/j.jfma.2020.08.018	2021	15	5
Bajantri Bharat, 2018, J CLIN MED RES, V10, P535, DOI 10.14740/jocmr3421w	2018	27	4.5
Tanaka T, 2017, EMERG INFECT DIS, V23, P1703, DOI 10.3201/eid2310.170106	2017	31	4.42857
Liu JR, 2020, BMC INFECT DIS, V20, P0, DOI 10.1186/s12879-020-4774-9	2020	17	4.25
Choi YJ, 2019, RESP RES, V20, P0, DOI 10.1186/s12931-019-1152-5	2019	21	4.2
Yan C, 2019, PEDIATR PULM, V54, P1012, DOI 10.1002/ppul.24327	2019	20	4
Sauteur PMM, 2020, JAMA DERMATOL, V156, P144, DOI 10.1001/jamadermatol.2019.3602	2020	16	4
Huang X, 2021, BMC INFECT DIS, V21, P0, DOI 10.1186/s12879-020-05700-5	2021	12	4
Choi YJ, 2022, J CLIN MED, V11, P0, DOI 10.3390/jcm11020306	2022	8	4
Diaz MH, 2015, J CLIN MICROBIOL, V53, P124, DOI 10.1128/JCM.02597-14	2015	35	3.88889
Kumar S, 2018, INDIAN J MED RES, V147, P23, DOI 10.4103/ijmr.IJMR, 1582, 16	2018	23	3.83333
Yang EA, 2019, J CLIN MED, V8, P0, DOI 10.3390/jcm8050726	2019	19	3.8
Yamazaki T, 2016, FRONT MICROBIOL, V7, P0, DOI 10.3389/fmicb.2016.00693	2016	30	3.75
Krafft C, 2020, PEDIATR REV, V41, P12, DOI 10.1542/pir.2018-0016	2020	15	3.75
Qu JX, 2019, INT J INFECT DIS, V83, P26, DOI 10.1016/j.ijid.2019.03.028	2019	18	3.6
Lee E, 2020, BMC INFECT DIS, V20, P0, DOI 10.1186/s12879-020-4810-9	2020	14	3.5
Lee Eun, 2017, KOREAN J PEDIATR, V60, P151, DOI 10.3345/kjp.2017.60.5.151	2017	24	3.42857
Izumikawa K, 2016, FRONT MICROBIOL, V7, P0, DOI 10.3389/fmicb.2016.00800	2016	27	3.375
Okada T, 2012, CLIN INFECT DIS, V55, P1642, DOI 10.1093/cid/cis784	2012	39	3.25
Spuesens EBM, 2013, PLOS MED, V10, P0, DOI 10.1371/journal.pmed.1001444	2013	35	3.18182
Ishiguro N, 2017, PLOS ONE, V12, P0, DOI 10.1371/journal.pone.0173635	2017	22	3.14286
Yoon IA, 2017, BMC INFECT DIS, V17, P0, DOI 10.1186/s12879-017-2500-z	2017	22	3.14286
Zhang YY, 2016, SCI REP-UK, V6, P0, DOI 10.1038/srep37037	2016	25	3.125
Kumar S, 2019, TROP DOCT, V49, P117, DOI 10.1177/0049475518816591	2019	15	3
Li G, 2019, MOL MED, V25, P0, DOI 10.1186/s10020-019-0105-2	2019	15	3
Zhao F, 2019, ANTIMICROB RESIST IN, V8, P0, DOI 10.1186/s13756-019-0469-7	2019	15	3
Gong H, 2021, MEDICINE, V100, P0, DOI 10.1097/MD.0000000000024894	2021	9	3
Zhao F, 2013, ANTIMICROB AGENTS CH, V57, P1521, DOI 10.1128/AAC.02060-12	2013	32	2.90909
Ding Y, 2018, BMC INFECT DIS, V18, P0, DOI 10.1186/s12879-018-3346-8	2018	17	2.83333
Liu TY, 2018, PEDIATR NEONATOL, V59, P501, DOI 10.1016/j.pedneo.2017.12.008	2018	17	2.83333
Waites KB, 2019, J CLIN MICROBIOL, V57, P0, DOI 10.1128/JCM.00968-19	2019	14	2.8
Yang MY, 2019, SCI REP-UK, V9, P0, DOI 10.1038/s41598-019-54313-9	2019	14	2.8
Rogozinski LE, 2017, MINERVA PEDIATR, V69, P156, DOI 10.23736/S0026-4946.16.04866-0	2017	19	2.71429
Chironna M, 2011, J ANTIMICROB CHEMOTH, V66, P734, DOI 10.1093/jac/dkr003	2011	35	2.69231
Zheng XT, 2015, EMERG INFECT DIS, V21, P1470, DOI 10.3201/eid2108.150273	2015	24	2.66667
Hung HM, 2021, CLIN MICROBIOL INFEC, V27, P0, DOI 10.1016/j.cmi.2020.09.035	2021	8	2.66667
Nakamura Y, 2021, J INFECT CHEMOTHER, V27, P271, DOI 10.1016/j.jiac.2020.10.007	2021	8	2.66667
Morozumi M, 2010, J INFECT CHEMOTHER, V16, P78, DOI 10.1007/s10156-009-0021-4	2010	37	2.64286
Wang MJ, 2014, INT J INFECT DIS, V29, P18, DOI 10.1016/j.ijid.2014.07.020	2014	26	2.6
Zhou YL, 2014, ANTIMICROB AGENTS CH, V58, P1034, DOI 10.1128/AAC.01806-13	2014	26	2.6
Guo DX, 2019, BOSNIAN J BASIC MED, V19, P288, DOI 10.17305/bjbms.2019.4053	2019	13	2.6
OBrien KL, 2019, LANCET, V394, P757, DOI 10.1016/S0140-6736(19)30721-4	2019	13	2.6
Dumke R, 2015, EMERG INFECT DIS, V21, P426, DOI 10.3201/eid2103.140927	2015	23	2.55556
Bradley JS, 2011, CLIN INFECT DIS, V53, PE25, DOI 10.1093/cid/cir531	2011	33	2.53846
Yan C, 2016, J CLIN MICROBIOL, V54, P1400, DOI 10.1128/JCM.00184-16	2016	20	2.5
Poddighe D, 2018, IRAN J ALLERGY ASTHM, V17, P490	2018	15	2.5
Cheng SY, 2020, PEDIATR PULM, V55, P968, DOI 10.1002/ppul.24684	2020	10	2.5
Ling YY, 2020, BMC INFECT DIS, V20, P0, DOI 10.1186/s12879-020-05270-6	2020	10	2.5
Xiao L, 2020, J CLIN MICROBIOL, V58, P0, DOI 10.1128/JCM.00710-20	2020	10	2.5
Guo ZL, 2022, J GLOB ANTIMICROB RE, V28, P180, DOI 10.1016/j.jgar.2022.01.002	2022	5	2.5
Medjo B, 2014, ITAL J PEDIATR, V40, P0, DOI 10.1186/s13052-014-0104-4	2014	24	2.4
Katsukawa C, 2019, PLOS ONE, V14, P0, DOI 10.1371/journal.pone.0209938	2019	12	2.4
Zhao F, 2019, ANTIMICROB RESIST IN, V8, P0, DOI 10.1186/s13756-019-0576-5	2019	12	2.4
Loens K, 2016, FRONT MICROBIOL, V7, P0, DOI 10.3389/fmicb.2016.00448	2016	19	2.375
Han MS, 2018, PEDIATR INFECT DIS J, V37, P531, DOI 10.1097/INF.0000000000001819	2018	14	2.33333
Maselli DJ, 2018, AM J RESP CELL MOL, V58, P253, DOI 10.1165/rcmb.2017-0006OC	2018	14	2.33333
Sauteur PMM, 2018, PEDIATR INFECT DIS J, V37, P1192, DOI 10.1097/INF.0000000000002171	2018	14	2.33333
Zhang XX, 2018, EPIDEMIOL INFECT, V146, P1384, DOI 10.1017/S0950268818000778	2018	14	2.33333
Lanata MM, 2021, EMERG INFECT DIS, V27, P1588, DOI 10.3201/eid2706.203206	2021	7	2.33333
Lee YC, 2021, J MICROBIOL IMMUNOL, V54, P673, DOI 10.1016/j.jmii.2020.03.030	2021	7	2.33333
Zhu ZL, 2021, BMC INFECT DIS, V21, P0, DOI 10.1186/s12879-021-05830-4	2021	7	2.33333
You SY, 2014, ALLERGY ASTHMA IMMUN, V6, P22, DOI 10.4168/aair.2014.6.1.22	2014	23	2.3
Kawai Y, 2013, ANTIMICROB AGENTS CH, V57, P4046, DOI 10.1128/AAC.00663-13	2013	25	2.27273
Chaudhry R, 2016, INDIAN J MED MICROBI, V34, P7, DOI 10.4103/0255-0857.174112	2016	18	2.25
Shimizu T, 2016, FRONT MICROBIOL, V7, P0, DOI 10.3389/fmicb.2016.00414	2016	18	2.25
Sauteur PMM, 2020, CLIN INFECT DIS, V71, P1645, DOI 10.1093/cid/ciz1059	2020	9	2.25
Zheng BY, 2020, BMC INFECT DIS, V20, P0, DOI 10.1186/s12879-020-05110-7	2020	9	2.25
Jin XN, 2018, MEDICINE, V97, P0, DOI 10.1097/MD.0000000000010103	2018	13	2.16667
Segovia JA, 2018, INFECT IMMUN, V86, P0, DOI 10.1128/IAI.00548-17	2018	13	2.16667
Cao B, 2010, CLIN INFECT DIS, V51, P189, DOI 10.1086/653535	2010	30	2.14286
Dumke R, 2010, CLIN MICROBIOL INFEC, V16, P613, DOI 10.1111/j.1469-0691.2009.02968.x	2010	30	2.14286
Benet T, 2017, CLIN INFECT DIS, V65, P604, DOI 10.1093/cid/cix378	2017	15	2.14286
Cao B, 2017, CLIN RESPIR J, V11, P419, DOI 10.1111/crj.12379	2017	15	2.14286
Lee WJ, 2017, CLIN VACCINE IMMUNOL, V24, P0, DOI 10.1128/CVI.00471-16	2017	15	2.14286
Morozumi M, 2008, ANTIMICROB AGENTS CH, V52, P348, DOI 10.1128/AAC.00779-07	2008	34	2.125
Brown RJ, 2016, FRONT MICROBIOL, V7, P0, DOI 10.3389/fmicb.2016.00157	2016	17	2.125
Jacobs E, 2015, INT J MED MICROBIOL, V305, P705, DOI 10.1016/j.ijmm.2015.08.021	2015	19	2.11111
Miyashita N, 2015, J INFECT CHEMOTHER, V21, P153, DOI 10.1016/j.jiac.2014.10.008	2015	19	2.11111
Principi N, 2013, J ANTIMICROB CHEMOTH, V68, P506, DOI 10.1093/jac/dks457	2013	23	2.09091
Peuchant O, 2009, J ANTIMICROB CHEMOTH, V64, P52, DOI 10.1093/jac/dkp160	2009	31	2.06667
Atkinson TP, 2014, PEDIATR INFECT DIS J, V33, P92, DOI 10.1097/INF.0000000000000171	2014	20	2
Kim Eun-Kyung, 2015, KOREAN J PEDIATR, V58, P172, DOI 10.3345/kjp.2015.58.5.172	2015	18	2
Zhou ZB, 2015, ANTIMICROB AGENTS CH, V59, P1048, DOI 10.1128/AAC.04308-14	2015	18	2
Yan YD, 2016, SCI REP-UK, V6, P0, DOI 10.1038/srep39929	2016	16	2
Shan LS, 2017, WORLD J PEDIATR, V13, P321, DOI 10.1007/s12519-017-0014-9	2017	14	2
Yang MY, 2017, SCI REP-UK, V7, P0, DOI 10.1038/s41598-017-13292-5	2017	14	2
Kim HS, 2019, BMC PULM MED, V19, P0, DOI 10.1186/s12890-019-0990-8	2019	10	2
Okumura T, 2019, J INFECT CHEMOTHER, V25, P346, DOI 10.1016/j.jiac.2019.01.003	2019	10	2
Expert Committee on Rational Use of Medicines for Children Pharmaceutical Group National Health and Family Planning Commission, 2020, ZHONGHUA ER KE ZA ZHI, V58, P366, DOI 10.3760/cma.j.cn112140-20200304-00176	2020	8	2
Lu CY, 2020, J FORMOS MED ASSOC, V119, P1539, DOI 10.1016/j.jfma.2019.12.008	2020	8	2
Qiu JL, 2020, MEDICINE, V99, P0, DOI 10.1097/MD.0000000000020121	2020	8	2
Jiang ZL, 2021, PATHOGENS, V10, P0, DOI 10.3390/pathogens10020119	2021	6	2
Hong KB, 2013, EMERG INFECT DIS, V19, P1281, DOI 10.3201/eid1908.121455	2013	21	1.90909
Kawai Y, 2013, ANTIMICROB AGENTS CH, V57, P2252, DOI 10.1128/AAC.00048-13	2013	21	1.90909
Diaz MH, 2015, OPEN FORUM INFECT DI, V2, P0, DOI 10.1093/ofid/ofv106	2015	17	1.88889
Matsubara K, 2009, J INFECT CHEMOTHER, V15, P380, DOI 10.1007/s10156-009-0715-7	2009	28	1.86667
Wang L, 2017, BMC INFECT DIS, V17, P0, DOI 10.1186/s12879-017-2614-3	2017	13	1.85714
Yamada M, 2012, PEDIATR INFECT DIS J, V31, P409, DOI 10.1097/INF.0b013e318247f3e0	2012	22	1.83333
Lee JK, 2018, EMERG INFECT DIS, V24, P1465, DOI 10.3201/eid2408.180081	2018	11	1.83333
Wolff BJ, 2008, ANTIMICROB AGENTS CH, V52, P3542, DOI 10.1128/AAC.00582-08	2008	29	1.8125
Chalker V. J., 2015, NEW MICROBES AND NEW INFECTIONS, V7, P37, DOI 10.1016/j.nmni.2015.05.005	2015	16	1.77778
Lu AZ, 2015, RESP CARE, V60, P1469, DOI 10.4187/respcare.03920	2015	16	1.77778
Ma YJ, 2015, J MICROBIOL IMMUNOL, V48, P632, DOI 10.1016/j.jmii.2014.08.003	2015	16	1.77778
Sun HM, 2015, RESP MED, V109, P751, DOI 10.1016/j.rmed.2015.04.006	2015	16	1.77778
Averbuch D, 2011, EMERG INFECT DIS, V17, P1079, DOI 10.3201/eid1706.101558	2011	23	1.76923
Harris M, 2011, THORAX, V66, PII1, DOI 10.1136/thoraxjnl-2011-200598	2011	23	1.76923
Poddighe D, 2020, MICROB PATHOGENESIS, V139, P0, DOI 10.1016/j.micpath.2019.103863	2020	7	1.75
Wood PR, 2013, ANN ALLERG ASTHMA IM, V110, P328, DOI 10.1016/j.anai.2013.01.022	2013	19	1.72727
Liu Y, 2010, DIAGN MICR INFEC DIS, V67, P355, DOI 10.1016/j.diagmicrobio.2010.03.004	2010	24	1.71429
Wood PR, 2017, ANN ALLERG ASTHMA IM, V119, P146, DOI 10.1016/j.anai.2017.05.022	2017	12	1.71429
de Groot RCA, 2017, J INFECTION, V74, PS95, DOI 10.1016/S0163-4453(17)30198-6	2017	12	1.71429
Waites KB, 2004, CLIN MICROBIOL REV, V17, P697, DOI 10.1128/CMR.17.4.697-728.2004	2004	34	1.7
Inamura N, 2014, J INFECT CHEMOTHER, V20, P270, DOI 10.1016/j.jiac.2014.01.001	2014	17	1.7
Luo ZX, 2014, PEDIATR PULM, V49, P377, DOI 10.1002/ppul.22752	2014	17	1.7
Canavan TN, 2015, J AM ACAD DERMATOL, V72, P239, DOI 10.1016/j.jaad.2014.06.026	2015	15	1.66667
Jain S, 2015, NEW ENGL J MED, V373, P415, DOI 10.1056/NEJMoa1500245	2015	15	1.66667
Huang LZ, 2018, BMJ OPEN, V8, P0, DOI 10.1136/bmjopen-2018-023719	2018	10	1.66667
Bi Y, 2021, SCI REP-UK, V11, P0, DOI 10.1038/s41598-021-86086-5	2021	5	1.66667
Lee E, 2021, J CLIN MED, V10, P0, DOI 10.3390/jcm10061154	2021	5	1.66667
Wang YC, 2021, FRONT CELL INFECT MI, V11, P0, DOI 10.3389/fcimb.2021.675466	2021	5	1.66667
He J, 2016, MOL MED REP, V14, P4030, DOI 10.3892/mmr.2016.5765	2016	13	1.625
Liu Y, 2009, ANTIMICROB AGENTS CH, V53, P2160, DOI 10.1128/AAC.01684-08	2009	24	1.6
Chang HY, 2014, J MICROBIOL IMMUNOL, V47, P137, DOI 10.1016/j.jmii.2013.03.015	2014	16	1.6
Liu JR, 2019, BMC INFECT DIS, V19, P0, DOI 10.1186/s12879-019-4667-y	2019	8	1.6
Sauteur PMM, 2019, AM J RESP CRIT CARE, V200, P1066, DOI 10.1164/rccm.201904-0860LE	2019	8	1.6
Wang ZH, 2019, J CLIN LAB ANAL, V33, P0, DOI 10.1002/jcla.22887	2019	8	1.6
Yang Hyeon-Jong, 2017, KOREAN J PEDIATR, V60, P167, DOI 10.3345/kjp.2017.60.6.167	2017	11	1.57143
Gardiner SJ, 2015, COCHRANE DB SYST REV, V0, P0, DOI 10.1002/14651858.CD004875.pub5	2015	14	1.55556
Pereyre S, 2013, CLIN MICROBIOL INFEC, V19, PE212, DOI 10.1111/1469-0691.12107	2013	17	1.54545
Nilsson AC, 2008, BMC MICROBIOL, V8, P0, DOI 10.1186/1471-2180-8-93	2008	24	1.5
Izumikawa K, 2014, J INFECT CHEMOTHER, V20, P181, DOI 10.1016/j.jiac.2013.09.009	2014	15	1.5
Lee SC, 2016, MEDICINE, V95, P0, DOI 10.1097/MD.0000000000003605	2016	12	1.5
Kassisse E, 2018, ARCH ARGENT PEDIATR, V116, P179, DOI 10.5546/aap.2018.eng.179	2018	9	1.5
Xue GH, 2018, PLOS ONE, V13, P0, DOI 10.1371/journal.pone.0198557	2018	9	1.5
Poddighe D, 2020, J MICROBIOL IMMUNOL, V53, P188, DOI 10.1016/j.jmii.2019.04.011	2020	6	1.5
Rivaya B, 2020, J ANTIMICROB CHEMOTH, V75, P2752, DOI 10.1093/jac/dkaa256	2020	6	1.5
Sun LL, 2020, PEDIATR INFECT DIS J, V39, P177, DOI 10.1097/INF.0000000000002529	2020	6	1.5
Wang HP, 2020, PLOS ONE, V15, P0, DOI 10.1371/journal.pone.0232610	2020	6	1.5
Zhao J, 2020, BMC INFECT DIS, V20, P0, DOI 10.1186/s12879-020-05017-3	2020	6	1.5
Chen JD, 2022, MICROBIOL SPECTR, V10, P0, DOI 10.1128/spectrum.01550-21	2022	3	1.5
Lee JK, 2022, J MICROBIOL IMMUNOL, V55, P910, DOI 10.1016/j.jmii.2021.07.011	2022	3	1.5
Tong L, 2022, J CLIN MED, V11, P0, DOI 10.3390/jcm11102824	2022	3	1.5
Li X, 2009, PEDIATR INFECT DIS J, V28, P693, DOI 10.1097/INF.0b013e31819e3f7a	2009	22	1.46667
Miyashita N, 2013, ANTIMICROB AGENTS CH, V57, P5181, DOI 10.1128/AAC.00737-13	2013	16	1.45455
Guo L, 2015, PEDIATR PULM, V50, P814, DOI 10.1002/ppul.23095	2015	13	1.44444
Olson D, 2015, PEDIATRICS, V136, PE386, DOI 10.1542/peds.2015-0278	2015	13	1.44444
Kim JH, 2017, ALLERGY ASTHMA IMMUN, V9, P340, DOI 10.4168/aair.2017.9.4.340	2017	10	1.42857
Miyashita N, 2012, BMC INFECT DIS, V12, P0, DOI 10.1186/1471-2334-12-126	2012	17	1.41667
Biondi E, 2014, PEDIATRICS, V133, P1081, DOI 10.1542/peds.2013-3729	2014	14	1.4
Gullsby K, 2019, J CLIN MICROBIOL, V57, P0, DOI 10.1128/jcm.00049-19	2019	7	1.4
Kurkela S, 2019, EUR J CLIN MICROBIOL, V38, P1867, DOI 10.1007/s10096-019-03619-7	2019	7	1.4
Atkinson TP, 2008, FEMS MICROBIOL REV, V32, P956, DOI 10.1111/j.1574-6976.2008.00129.x	2008	22	1.375
Jin XQ, 2018, EXP THER MED, V16, P5025, DOI 10.3892/etm.2018.6873	2018	8	1.33333
Wang X, 2018, WORLD J PEDIATR, V14, P344, DOI 10.1007/s12519-018-0162-6	2018	8	1.33333
Biagi C, 2021, MICROORGANISMS, V9, P0, DOI 10.3390/microorganisms9122553	2021	4	1.33333
Chang CH, 2021, PEDIATR NEONATOL, V62, P536, DOI 10.1016/j.pedneo.2021.05.017	2021	4	1.33333
Cho HK, 2021, CLIN EXP PEDIATR, V64, P459, DOI 10.3345/cep.2020.01305	2021	4	1.33333
Global Initiative for Asthma, 2021, GLOB STRAT ASTHM MAN, V0, P0	2021	4	1.33333
Kakiuchi T, 2021, J CLIN MICROBIOL, V59, P0, DOI 10.1128/JCM.03245-20	2021	4	1.33333
Saraya T, 2014, FRONT MICROBIOL, V5, P0, DOI 10.3389/fmicb.2014.00410	2014	13	1.3
Sauteur PMM, 2014, CURR OPIN INFECT DIS, V27, P220, DOI 10.1097/QCO.0000000000000063	2014	13	1.3
Sauteur PMM, 2014, PLOS PATHOG, V10, P0, DOI 10.1371/journal.ppat.1003983	2014	13	1.3
Li TH, 2017, J INT MED RES, V45, P2110, DOI 10.1177/0300060517709613	2017	9	1.28571
Xin DL, 2009, ANTIMICROB AGENTS CH, V53, P2158, DOI 10.1128/AAC.01563-08	2009	19	1.26667
Lenglet A, 2012, EUROSURVEILLANCE, V17, P2	2012	15	1.25
Pereyre S, 2012, PLOS ONE, V7, P0, DOI 10.1371/journal.pone.0038585	2012	15	1.25
Cheong KN, 2016, J MICROBIOL IMMUNOL, V49, P127, DOI 10.1016/j.jmii.2014.11.003	2016	10	1.25
Gao JJ, 2020, BMC INFECT DIS, V20, P0, DOI 10.1186/s12879-020-05152-x	2020	5	1.25
Lee E, 2020, RESP MED, V175, P0, DOI 10.1016/j.rmed.2020.106209	2020	5	1.25
Wei DH, 2020, BIOMED ENVIRON SCI, V33, P916, DOI 10.3967/bes2020.125	2020	5	1.25
Bebear C, 2011, FUTURE MICROBIOL, V6, P423, DOI 10.2217/FMB.11.18	2011	16	1.23077
Chiu CY, 2015, J MICROBIOL IMMUNOL, V48, P51, DOI 10.1016/j.jmii.2013.06.006	2015	11	1.22222
Ratliff AE, 2014, J CLIN MICROBIOL, V52, P1060, DOI 10.1128/JCM.02913-13	2014	12	1.2
Waller JL, 2014, J CLIN MICROBIOL, V52, P849, DOI 10.1128/JCM.02810-13	2014	12	1.2
Cho YJ, 2019, PLOS ONE, V14, P0, DOI 10.1371/journal.pone.0219463	2019	6	1.2
Goyal A, 2019, PEDIATR DERMATOL, V36, P929, DOI 10.1111/pde.13921	2019	6	1.2
Shi S, 2019, SCI REP-UK, V9, P0, DOI 10.1038/s41598-019-43451-9	2019	6	1.2
[中华人民共和国国家健康委员会 National Health Commission of The Peoples Republic of China], 2019, 中华临床感染病杂志 CHINESE JOURNAL OF CLINICAL INFECTIOUS DISEASES, V12, P6	2019	6	1.2
Eshaghi A, 2013, EMERG INFECT DIS, V19, P1525, DOI 10.3201/eid1909.121466	2013	13	1.18182
Matsuda K, 2013, BMC INFECT DIS, V13, P0, DOI 10.1186/1471-2334-13-591	2013	13	1.18182
Akashi Y, 2018, J GEN FAM MED, V19, P191, DOI 10.1002/jgf2.201	2018	7	1.16667
Carrim M, 2018, EMERG INFECT DIS, V24, P506, DOI 10.3201/eid2403.162052	2018	7	1.16667
Yang DH, 2018, PLOS ONE, V13, P0, DOI 10.1371/journal.pone.0191951	2018	7	1.16667
Bezerra PGM, 2011, PLOS ONE, V6, P0, DOI 10.1371/journal.pone.0018928	2011	15	1.15385
Mayor-Ibarguren A, 2017, PEDIATR DERMATOL, V34, P465, DOI 10.1111/pde.13140	2017	8	1.14286
Saraya T, 2017, J GEN FAM MED, V18, P118, DOI 10.1002/jgf2.15	2017	8	1.14286
Defilippi A, 2008, RESP MED, V102, P1762, DOI 10.1016/j.rmed.2008.06.022	2008	18	1.125
Guo HM, 2016, J INFECT CHEMOTHER, V22, P162, DOI 10.1016/j.jiac.2015.12.006	2016	9	1.125
Parrott GL, 2016, FRONT MICROBIOL, V7, P0, DOI 10.3389/fmicb.2016.00513	2016	9	1.125
Al-Zaidy SA, 2015, CLIN INFECT DIS, V61, P1092, DOI 10.1093/cid/civ473	2015	10	1.11111
Chalker VJ, 2012, EUROSURVEILLANCE, V17, P5	2012	13	1.08333
Daxboeck F, 2003, CLIN MICROBIOL INFEC, V9, P263, DOI 10.1046/j.1469-0691.2003.00590.x	2003	22	1.04762
Suzuki S, 2006, ANTIMICROB AGENTS CH, V50, P709, DOI 10.1128/AAC.50.2.709-712.2006	2006	18	1
Dumke R, 2014, INT J INFECT DIS, V29, P197, DOI 10.1016/j.ijid.2014.07.014	2014	10	1
Shin Jeong Eun, 2014, KOREAN J PEDIATR, V57, P271, DOI 10.3345/kjp.2014.57.6.271	2014	10	1
Ho PL, 2015, J CLIN MICROBIOL, V53, P3560, DOI 10.1128/JCM.01983-15	2015	9	1
Song Q, 2015, INT J CLIN EXP MED, V8, P15666	2015	9	1
Diaz MH, 2016, FRONT MICROBIOL, V7, P0, DOI 10.3389/fmicb.2016.00232	2016	8	1
Sun HM, 2017, PLOS ONE, V12, P0, DOI 10.1371/journal.pone.0170253	2017	7	1
Okubo Y, 2018, RESPIR INVESTIG, V56, P158, DOI 10.1016/j.resinv.2017.11.005	2018	6	1
Duan XJ, 2019, J CLIN PHARM THER, V44, P675, DOI 10.1111/jcpt.12855	2019	5	1
Gordon O, 2019, PEDIATR INFECT DIS J, V38, P698, DOI 10.1097/INF.0000000000002291	2019	5	1
Wang YC, 2019, AMB EXPRESS, V9, P0, DOI 10.1186/s13568-019-0921-3	2019	5	1
Wu HT, 2019, J INT MED RES, V47, P2555, DOI 10.1177/0300060518820412	2019	5	1
Chi H, 2020, J FORMOS MED ASSOC, V119, P1490, DOI 10.1016/j.jfma.2020.07.014	2020	4	1
Leung NHL, 2020, NAT MED, V26, P676, DOI 10.1038/s41591-020-0843-2	2020	4	1
Mazori DR, 2020, PEDIATR DERMATOL, V37, P545, DOI 10.1111/pde.14142	2020	4	1
Morozumi M, 2020, EMERG INFECT DIS, V26, P2210, DOI 10.3201/eid2609.191575	2020	4	1
Sauteur PMM, 2020, J INFECT DIS, V222, P136, DOI 10.1093/infdis/jiaa062	2020	4	1
Wang L, 2020, PEDIATR PULM, V55, P3088, DOI 10.1002/ppul.25016	2020	4	1
Wu LN, 2020, CLIN CHIM ACTA, V503, P76, DOI 10.1016/j.cca.2020.01.004	2020	4	1
Esposito S, 2021, EXPERT OPIN PHARMACO, V22, P1193, DOI 10.1080/14656566.2021.1882420	2021	3	1
Han HY, 2021, J CLIN MED, V10, P0, DOI 10.3390/jcm10061309	2021	3	1
Kawakami N, 2021, J INFECT CHEMOTHER, V27, P45, DOI 10.1016/j.jiac.2020.08.006	2021	3	1
Lee H, 2021, ANTIBIOTICS-BASEL, V10, P0, DOI 10.3390/antibiotics10020192	2021	3	1
Li L, 2021, VIROL J, V18, P0, DOI 10.1186/s12985-021-01669-y	2021	3	1
Ling XY, 2021, FRONT PHARMACOL, V12, P0, DOI 10.3389/fphar.2021.678631	2021	3	1
Ling YY, 2021, FRONT PEDIATR, V9, P0, DOI 10.3389/fped.2021.659677	2021	3	1
Luo H, 2021, CLIN EXP IMMUNOL, V203, P66, DOI 10.1111/cei.13510	2021	3	1
Ramien ML, 2021, CLIN EXP DERMATOL, V46, P420, DOI 10.1111/ced.14404	2021	3	1
Zhang TQ, 2021, FRONT PEDIATR, V9, P0, DOI 10.3389/fped.2021.741663	2021	3	1
Choo S, 2022, BMC INFECT DIS, V22, P0, DOI 10.1186/s12879-022-07456-6	2022	2	1
Huang JJ, 2022, RESP RES, V23, P0, DOI 10.1186/s12931-022-01975-1	2022	2	1
Huang WH, 2022, J IMMUNOL RES, V2022, P0, DOI 10.1155/2022/9227838	2022	2	1
Malik AA, 2022, MOL DIVERS, V26, P467, DOI 10.1007/s11030-021-10292-6	2022	2	1
Miyashita N, 2022, RESPIR INVESTIG, V60, P56, DOI 10.1016/j.resinv.2021.09.009	2022	2	1
Rhim JW, 2022, CLIN EXP PEDIATR, V65, P153, DOI 10.3345/cep.2021.01270	2022	2	1
Srinivas P, 2022, BIOMED SIGNAL PROCES, V73, P0, DOI 10.1016/j.bspc.2021.103456	2022	2	1
Morozumi M, 2005, ANTIMICROB AGENTS CH, V49, P2302, DOI 10.1128/AAC.49.6.2302-2306.2005	2005	18	0.947368
Thurman KA, 2009, CLIN INFECT DIS, V48, P1244, DOI 10.1086/597775	2009	14	0.933333
Miyashita N, 2012, RESPIROLOGY, V17, P1073, DOI 10.1111/j.1440-1843.2012.02188.x	2012	11	0.916667
Spuesens EBM, 2012, J CLIN MICROBIOL, V50, P1999, DOI 10.1128/JCM.00400-12	2012	11	0.916667
Wu PS, 2013, PEDIATR PULM, V48, P904, DOI 10.1002/ppul.22706	2013	10	0.909091
Michelow IC, 2004, PEDIATRICS, V113, P701, DOI 10.1542/peds.113.4.701	2004	18	0.9
Spuesens EBM, 2014, J INFECTION, V69, PS42, DOI 10.1016/j.jinf.2014.07.017	2014	9	0.9
Brown RJ, 2015, EUROSURVEILLANCE, V20, P6, DOI 10.2807/1560-7917.ES.2015.20.48.30078	2015	8	0.888889
Liu L, 2015, LANCET, V385, P430, DOI 10.1016/S0140-6736(14)61698-6	2015	8	0.888889
Miyashita N, 2015, J INFECT CHEMOTHER, V21, P473, DOI 10.1016/j.jiac.2015.02.007	2015	8	0.888889
Ding SG, 2016, PLOS ONE, V11, P0, DOI 10.1371/journal.pone.0146397	2016	7	0.875
Jackson MA, 2016, PEDIATRICS, V138, P0, DOI 10.1542/peds.2016-2706	2016	7	0.875
Sauteur PMM, 2016, ANN NEUROL, V80, P566, DOI 10.1002/ana.24755	2016	7	0.875
Kim YJ, 2017, J KOREAN MED SCI, V32, P1642, DOI 10.3346/jkms.2017.32.10.1642	2017	6	0.857143
Ruuskanen O, 2011, LANCET, V377, P1264, DOI 10.1016/S0140-6736(10)61459-6	2011	11	0.846154
Johnston SL, 2005, AM J RESP CRIT CARE, V172, P1078, DOI 10.1164/rccm.200412-1743PP	2005	16	0.842105
Benitez AJ, 2012, J CLIN MICROBIOL, V50, P3620, DOI 10.1128/JCM.01755-12	2012	10	0.833333
Ando M, 2018, EMERG INFECT DIS, V24, P1898, DOI 10.3201/eid2410.171194	2018	5	0.833333
Chen Yu, 2018, ZHONGGUO DANG DAI ER KE ZA ZHI, V20, P629	2018	5	0.833333
Copete AR, 2018, INT J INFECT DIS, V66, P113, DOI 10.1016/j.ijid.2017.11.019	2018	5	0.833333
Hao OM, 2018, J MED VIROL, V90, P421, DOI 10.1002/jmv.24963	2018	5	0.833333
Lin Y, 2018, MEDIAT INFLAMM, V2018, P0, DOI 10.1155/2018/8753894	2018	5	0.833333
Qu JX, 2018, BMC INFECT DIS, V18, P0, DOI 10.1186/s12879-018-3250-2	2018	5	0.833333
Wang Y, 2018, CAN RESPIR J, V2018, P0, DOI 10.1155/2018/8354892	2018	5	0.833333
Walker CLF, 2013, LANCET, V381, P1405, DOI 10.1016/S0140-6736(13)60222-6	2013	9	0.818182
Dorigo-Zetsma JW, 1999, J CLIN MICROBIOL, V37, P14, DOI 10.1128/JCM.37.1.14-17.1999	1999	20	0.8
Seo Young Ho, 2014, KOREAN J PEDIATR, V57, P186, DOI 10.3345/kjp.2014.57.4.186	2014	8	0.8
Fan HF, 2019, JPN J INFECT DIS, V72, P387, DOI 10.7883/yoken.JJID.2019.113	2019	4	0.8
Li QL, 2019, ITAL J PEDIATR, V45, P0, DOI 10.1186/s13052-019-0655-5	2019	4	0.8
Lin MM, 2019, ANN PALLIAT MED, V8, P632, DOI 10.21037/apm.2019.10.05	2019	4	0.8
Zhao MC, 2019, BMC INFECT DIS, V19, P0, DOI 10.1186/s12879-019-4426-0	2019	4	0.8
Youn YS, 2010, BMC PEDIATR, V10, P0, DOI 10.1186/1471-2431-10-48	2010	11	0.785714
Becker A, 2015, P NATL ACAD SCI USA, V112, P5165, DOI 10.1073/pnas.1420308112	2015	7	0.777778
Li W, 2015, SCI REP-UK, V5, P0, DOI 10.1038/srep15539	2015	7	0.777778
Rhedin S, 2015, THORAX, V70, P847, DOI 10.1136/thoraxjnl-2015-206933	2015	7	0.777778
Kraft M, 2002, CHEST, V121, P1782, DOI 10.1378/chest.121.6.1782	2002	17	0.772727
Heiskanen-Kosma T, 1998, PEDIATR INFECT DIS J, V17, P986, DOI 10.1097/00006454-199811000-00004	1998	20	0.769231
Wubbel L, 1999, PEDIATR INFECT DIS J, V18, P98, DOI 10.1097/00006454-199902000-00004	1999	19	0.76
Korppi M, 2004, RESPIROLOGY, V9, P109, DOI 10.1111/j.1440-1843.2003.00522.x	2004	15	0.75
Waitest KB, 2008, FUTURE MICROBIOL, V3, P635, DOI 10.2217/17460913.3.6.635	2008	12	0.75
Jeong YC, 2012, ALLERGY ASTHMA IMMUN, V4, P92, DOI 10.4168/aair.2012.4.2.92	2012	9	0.75
Polkowska A, 2012, EUROSURVEILLANCE, V17, P8	2012	9	0.75
Youn You-Sook, 2012, KOREAN J PEDIATR, V55, P42, DOI 10.3345/kjp.2012.55.2.42	2012	9	0.75
Li W, 2016, IRAN J PEDIATR, V26, P0, DOI 10.5812/ijp.3807	2016	6	0.75
Yeh JJ, 2016, J ALLERGY CLIN IMMUN, V137, P1017, DOI 10.1016/j.jaci.2015.09.032	2016	6	0.75
Beeton ML, 2020, EUROSURVEILLANCE, V25, P39, DOI 10.2807/1560-7917.ES.2020.25.2.1900112	2020	3	0.75
Bialek S, 2020, MMWR-MORBID MORTAL W, V69, P422, DOI 10.15585/mmwr.mm6914e4	2020	3	0.75
Chen SJ, 2020, LANCET INFECT DIS, V20, P1347, DOI 10.1016/S1473-3099(20)30253-X	2020	3	0.75
Copete AR, 2020, PEDIATR INFECT DIS J, V39, PE104, DOI 10.1097/INF.0000000000002636	2020	3	0.75
Han R, 2020, PAK J MED SCI, V36, P156, DOI 10.12669/pjms.36.2.1441	2020	3	0.75
He SY, 2020, J MICROBIOL METH, V173, P0, DOI 10.1016/j.mimet.2020.105921	2020	3	0.75
Kim D, 2020, JAMA-J AM MED ASSOC, V323, P2085, DOI 10.1001/jama.2020.6266	2020	3	0.75
Kuitunen I, 2020, PEDIATR INFECT DIS J, V39, PE423, DOI 10.1097/INF.0000000000002845	2020	3	0.75
Lee KY, 2020, CLIN EXP PEDIATR, V63, P239, DOI 10.3345/cep.2020.00759	2020	3	0.75
Li QL, 2020, ANN TRANSL MED, V8, P0, DOI 10.21037/atm.2020.03.121	2020	3	0.75
Li Y, 2020, EUR J CLIN MICROBIOL, V39, P369, DOI 10.1007/s10096-019-03734-5	2020	3	0.75
Liu JX, 2020, AM J INFECT CONTROL, V48, P1231, DOI 10.1016/j.ajic.2020.01.013	2020	3	0.75
Mirijello A, 2020, EUR REV MED PHARMACO, V24, P10061, DOI 10.26355/eurrev, 202010, 23223	2020	3	0.75
Morinaga Y, 2020, J MED MICROBIOL, V69, P1346, DOI 10.1099/jmm.0.001264	2020	3	0.75
Voronina EN, 2020, EUR J CLIN MICROBIOL, V39, P257, DOI 10.1007/s10096-019-03717-6	2020	3	0.75
Xu XF, 2020, SCI REP-UK, V10, P0, DOI 10.1038/s41598-020-61348-w	2020	3	0.75
Beersma MFC, 2005, J CLIN MICROBIOL, V43, P2277, DOI 10.1128/JCM.43.5.2277-2285.2005	2005	14	0.736842
Ferguson GD, 2013, J MED MICROBIOL, V62, P1876, DOI 10.1099/jmm.0.066191-0	2013	8	0.727273
Hilty M, 2010, PLOS ONE, V5, P0, DOI 10.1371/journal.pone.0008578	2010	10	0.714286
Chkhaidze I, 2017, GEORGIAN MED NEWS, V0, P89	2017	5	0.714286
Zhao CS, 2017, SCI REP-UK, V7, P0, DOI 10.1038/s41598-017-08861-7	2017	5	0.714286
Biscardi S, 2004, CLIN INFECT DIS, V38, P1341, DOI 10.1086/392498	2004	14	0.7
Dumke R, 2014, J CLIN MICROBIOL, V52, P4078, DOI 10.1128/JCM.02048-14	2014	7	0.7
Huong PLT, 2014, BMC PUBLIC HEALTH, V14, P0, DOI 10.1186/1471-2458-14-1304	2014	7	0.7
Kurata S, 2014, BMC MICROBIOL, V14, P0, DOI 10.1186/1471-2180-14-156	2014	7	0.7
Xue GH, 2014, J CLIN MICROBIOL, V52, P1478, DOI 10.1128/JCM.03366-13	2014	7	0.7
Ye Q, 2014, SCI WORLD J, V0, P0, DOI 10.1155/2014/986527	2014	7	0.7
Martin RJ, 2001, J ALLERGY CLIN IMMUN, V107, P595, DOI 10.1067/mai.2001.113563	2001	16	0.695652
Principi Nicola, 2001, CLINICAL INFECTIOUS DISEASES, V32, P1281, DOI 10.1086/319981	2001	16	0.695652
Cardinale F, 2011, EUR RESPIR J, V37, P1522, DOI 10.1183/09031936.00172510	2011	9	0.692308
Templeton KE, 2003, J CLIN MICROBIOL, V41, P4366, DOI 10.1128/JCM.41.9.4366-4371.2003	2003	14	0.666667
Welti M, 2003, DIAGN MICR INFEC DIS, V45, P85, DOI 10.1016/S0732-8893(02)00484-4	2003	14	0.666667
Johnston SL, 2006, NEW ENGL J MED, V354, P1589, DOI 10.1056/NEJMoa044080	2006	12	0.666667
Atkinson TP, 2009, ALLERGY ASTHMA PROC, V30, P158, DOI 10.2500/aap.2009.30.3207	2009	10	0.666667
Uldum SA, 2012, EUROSURVEILLANCE, V17, P15	2012	8	0.666667
Bacharier LB, 2015, JAMA-J AM MED ASSOC, V314, P2034, DOI 10.1001/jama.2015.13896	2015	6	0.666667
Brealey JC, 2015, FEMS MICROBIOL LETT, V362, P0, DOI 10.1093/femsle/fnv062	2015	6	0.666667
Brown RJ, 2015, J CLIN MICROBIOL, V53, P3195, DOI 10.1128/JCM.01301-15	2015	6	0.666667
Chen KP, 2015, BMC PUBLIC HEALTH, V15, P0, DOI 10.1186/s12889-015-1422-1	2015	6	0.666667
Kogoj R, 2015, EUROSURVEILLANCE, V20, P14, DOI 10.2807/1560-7917.ES.2015.20.37.30018	2015	6	0.666667
Bai SW, 2021, BIOMED PHARMACOTHER, V143, P0, DOI 10.1016/j.biopha.2021.112184	2021	2	0.666667
Cheng Q, 2021, BMC INFECT DIS, V21, P0, DOI 10.1186/s12879-021-06783-4	2021	2	0.666667
Jeon H, 2021, DIAGNOSTICS, V11, P0, DOI 10.3390/diagnostics11020353	2021	2	0.666667
Li J, 2021, J GLOB ANTIMICROB RE, V24, P228, DOI 10.1016/j.jgar.2020.12.019	2021	2	0.666667
Li ZJ, 2021, NAT COMMUN, V12, P0, DOI 10.1038/s41467-021-25120-6	2021	2	0.666667
Qian YY, 2021, FRONT CELL INFECT MI, V10, P0, DOI 10.3389/fcimb.2020.567615	2021	2	0.666667
Sauteur PMM, 2021, J CLIN MICROBIOL, V59, P0, DOI 10.1128/JCM.00748-21	2021	2	0.666667
Su M, 2021, MEDICINE, V100, P0, DOI 10.1097/MD.0000000000023786	2021	2	0.666667
Tang MY, 2021, BMC PEDIATR, V21, P0, DOI 10.1186/s12887-021-02523-4	2021	2	0.666667
Harris JAS, 1998, PEDIATR INFECT DIS J, V17, P865, DOI 10.1097/00006454-199810000-00004	1998	17	0.653846
Waris ME, 1998, J CLIN MICROBIOL, V36, P3155, DOI 10.1128/JCM.36.11.3155-3159.1998	1998	17	0.653846
Narita M, 2010, J INFECT CHEMOTHER, V16, P162, DOI 10.1007/s10156-010-0044-x	2010	9	0.642857
Cardinale F, 2013, J CLIN MICROBIOL, V51, P723, DOI 10.1128/JCM.02840-12	2013	7	0.636364
He XY, 2013, DIAGN MICR INFEC DIS, V75, P22, DOI 10.1016/j.diagmicrobio.2012.08.027	2013	7	0.636364
Rudan I, 2013, J GLOB HEALTH, V3, P0, DOI 10.7189/jogh.03.010401	2013	7	0.636364
Martinez MA, 2008, J MED MICROBIOL, V57, P1491, DOI 10.1099/jmm.0.2008/003814-0	2008	10	0.625
Sanchez-Vargas FM, 2008, CLIN MICROBIOL INFEC, V14, P105, DOI 10.1111/j.1469-0691.2007.01834.x	2008	10	0.625
Chen ZR, 2016, PLOS ONE, V11, P0, DOI 10.1371/journal.pone.0146377	2016	5	0.625
Fan Q, 2016, HEART LUNG CIRC, V25, P1226, DOI 10.1016/j.hlc.2016.03.019	2016	5	0.625
Abele-Horn M, 1998, J CLIN MICROBIOL, V36, P548, DOI 10.1128/JCM.36.2.548-551.1998	1998	16	0.615385
Morozumi M, 2006, J CLIN MICROBIOL, V44, P1440, DOI 10.1128/JCM.44.4.1440-1446.2006	2006	11	0.611111
Ferwerda A, 2001, EUR J PEDIATR, V160, P483, DOI 10.1007/s004310100775	2001	14	0.608696
Degrange S, 2009, J CLIN MICROBIOL, V47, P914, DOI 10.1128/JCM.01935-08	2009	9	0.6
Narita M, 2009, PEDIATR NEUROL, V41, P159, DOI 10.1016/j.pediatrneurol.2009.04.012	2009	9	0.6
Bose S, 2014, MBIO, V5, P0, DOI 10.1128/mBio.02186-14	2014	6	0.6
Alishlash AS, 2019, PEDIATRICS, V144, P0, DOI 10.1542/peds.2019-1642	2019	3	0.6
Cai ZH, 2019, BMC INFECT DIS, V19, P0, DOI 10.1186/s12879-019-3799-4	2019	3	0.6
Dumke R, 2019, ANTIMICROB AGENTS CH, V63, P0, DOI 10.1128/AAC.00455-19	2019	3	0.6
Lee JK, 2019, BMC GENOMICS, V20, P0, DOI 10.1186/s12864-019-6306-9	2019	3	0.6
Li Q, 2019, EVID-BASED COMPL ALT, V2019, P0, DOI 10.1155/2019/2346583	2019	3	0.6
Loconsole D, 2019, BIOMED RES INT, V2019, P0, DOI 10.1155/2019/7168949	2019	3	0.6
Metlay JP, 2019, AM J RESP CRIT CARE, V200, PE45, DOI 10.1164/rccm.201908-1581ST	2019	3	0.6
Shah PR, 2019, CORNEA, V38, P1305, DOI 10.1097/ICO.0000000000001985	2019	3	0.6
McIntosh K, 2002, NEW ENGL J MED, V346, P429, DOI 10.1056/NEJMra011994	2002	13	0.590909
Pereyre S, 2007, J CLIN MICROBIOL, V45, P3534, DOI 10.1128/JCM.01345-07	2007	10	0.588235
Esposito S, 2000, EUR RESPIR J, V16, P1142, DOI 10.1034/j.1399-3003.2000.16f21.x	2000	14	0.583333
Akaike H, 2012, JPN J INFECT DIS, V65, P535, DOI 10.7883/yoken.65.535	2012	7	0.583333
Chalker VJ, 2012, EURO SURVEILL, V17, P0	2012	7	0.583333
Esposito S, 2012, PEDIATR INFECT DIS J, V31, PE78, DOI 10.1097/INF.0b013e318255dc5b	2012	7	0.583333
Uldum SA, 2012, EURO SURVEILL, V17, P0	2012	7	0.583333
Wang K, 2012, COCHRANE DB SYST REV, V0, P0, DOI 10.1002/14651858.CD009175.pub2	2012	7	0.583333
Zhao F, 2012, ANTIMICROB AGENTS CH, V56, P1108, DOI 10.1128/AAC.05627-11	2012	7	0.583333
Esposito S, 2005, PEDIATR INFECT DIS J, V24, P438, DOI 10.1097/01.inf.0000160949.99560.8d	2005	11	0.578947
Khanna M, 2005, J CLIN MICROBIOL, V43, P565, DOI 10.1128/JCM.43.2.565-571.2005	2005	11	0.578947
Tsiodras S, 2005, J INFECTION, V51, P343, DOI 10.1016/j.jinf.2005.07.005	2005	11	0.578947
Waites KB, 2003, PEDIATR PULM, V36, P267, DOI 10.1002/ppul.10346	2003	12	0.571429
Lin CY, 2010, J CLIN MICROBIOL, V48, P4567, DOI 10.1128/JCM.00400-10	2010	8	0.571429
Nair H, 2010, LANCET, V375, P1545, DOI 10.1016/S0140-6736(10)60206-1	2010	8	0.571429
Jiang WJ, 2017, BMC INFECT DIS, V17, P0, DOI 10.1186/s12879-017-2891-x	2017	4	0.571429
Kuwahara M, 2017, J NEUROL, V264, P467, DOI 10.1007/s00415-016-8371-1	2017	4	0.571429
Li W, 2017, PLOS ONE, V12, P0, DOI 10.1371/journal.pone.0177842	2017	4	0.571429
Olson D, 2017, J PEDIAT INF DIS SOC, V6, PE140, DOI 10.1093/jpids/piw085	2017	4	0.571429
Saraya T, 2017, INTERNAL MED, V56, P2845, DOI 10.2169/internalmedicine.8500-16	2017	4	0.571429
Xu QY, 2017, J TROP PEDIATRICS, V63, P148, DOI 10.1093/tropej/fmw064	2017	4	0.571429
Kashyap B, 2008, INDIAN J MED RES, V128, P134	2008	9	0.5625
Petrone BL, 2015, J CLIN MICROBIOL, V53, P2970, DOI 10.1128/JCM.01431-15	2015	5	0.555556
Matsuoka M, 2004, ANTIMICROB AGENTS CH, V48, P4624, DOI 10.1128/AAC.48.12.4624-4630.2004	2004	11	0.55
Brusselle GG, 2013, THORAX, V68, P322, DOI 10.1136/thoraxjnl-2012-202698	2013	6	0.545455
Qu JX, 2013, PLOS ONE, V8, P0, DOI 10.1371/journal.pone.0082174	2013	6	0.545455
Sun HM, 2013, PLOS ONE, V8, P0, DOI 10.1371/journal.pone.0064607	2013	6	0.545455
Suzuki Y, 2013, PEDIATR INFECT DIS J, V32, P237, DOI 10.1097/INF.0b013e31827aa7bd	2013	6	0.545455
Lu AZ, 2011, PEDIATR PULM, V46, P1093, DOI 10.1002/ppul.21481	2011	7	0.538462
Miyashita N, 2011, EUR J CLIN MICROBIOL, V30, P439, DOI 10.1007/s10096-010-1107-8	2011	7	0.538462
Oishi T, 2011, J INFECT CHEMOTHER, V17, P803, DOI 10.1007/s10156-011-0265-7	2011	7	0.538462
Mandell LA, 2007, CLIN INFECT DIS, V44, PS27, DOI 10.1086/511159	2007	9	0.529412
Kraft M, 1998, AM J RESP CRIT CARE, V158, P998, DOI 10.1164/ajrccm.158.3.9711092	1998	13	0.5
Cosentini R, 2008, RESP RES, V9, P0, DOI 10.1186/1465-9921-9-48	2008	8	0.5
Tagliabue C, 2008, J INFECT DIS, V198, P1180, DOI 10.1086/591915	2008	8	0.5
Garcia-Garcia ML, 2012, PEDIATR INFECT DIS J, V31, P808, DOI 10.1097/INF.0b013e3182568c67	2012	6	0.5
Kawai Yasuhiro, 2012, RESPIROLOGY, V17, P354, DOI 10.1111/j.1440-1843.2011.02102.x	2012	6	0.5
Liu Y, 2012, J CLIN MICROBIOL, V50, P2793, DOI 10.1128/JCM.00678-12	2012	6	0.5
Medina JL, 2012, AM J RESP CELL MOL, V46, P815, DOI 10.1165/rcmb.2011-0135OC	2012	6	0.5
Caballero JD, 2014, ANTIMICROB AGENTS CH, V58, P1265, DOI 10.1128/AAC.02325-13	2014	5	0.5
Cantais A, 2014, J CLIN VIROL, V60, P402, DOI 10.1016/j.jcv.2014.05.006	2014	5	0.5
Ishiguro N, 2016, JPN J INFECT DIS, V69, P186, DOI 10.7883/yoken.JJID.2015.054	2016	4	0.5
Kang Ben, 2016, KOREAN J PEDIATR, V59, P149, DOI 10.3345/kjp.2016.59.3.149	2016	4	0.5
Meza ED, 2016, J ASTHMA, V53, P253, DOI 10.3109/02770903.2015.1075548	2016	4	0.5
Stokholm J, 2016, LANCET RESP MED, V4, P19, DOI 10.1016/S2213-2600(16)00050-3	2016	4	0.5
Wang XW, 2016, J CLIN LAB ANAL, V30, P1214, DOI 10.1002/jcla.22005	2016	4	0.5
Arfaatabar M, 2018, GERMS, V8, P126, DOI 10.18683/germs.2018.1139	2018	3	0.5
Berlot JR, 2018, EUR J CLIN MICROBIOL, V37, P1265, DOI 10.1007/s10096-018-3243-5	2018	3	0.5
Blyth CC, 2018, J PEDIAT INF DIS SOC, V7, P71, DOI 10.1093/jpids/pix083	2018	3	0.5
DAlonzo R, 2018, FRONT MICROBIOL, V9, P0, DOI 10.3389/fmicb.2018.02751	2018	3	0.5
Ha SG, 2018, J KOREAN MED SCI, V33, P0, DOI 10.3346/jkms.2018.33.e268	2018	3	0.5
Ito Y, 2018, MOL DIAGN THER, V22, P737, DOI 10.1007/s40291-018-0360-x	2018	3	0.5
Jobran Shaden, 2018, LANCET, V391 Suppl 2, PS43, DOI 10.1016/S0140-6736(18)30409-4	2018	3	0.5
Kim JH, 2018, J THORAC DIS, V10, P6118, DOI 10.21037/jtd.2018.10.33	2018	3	0.5
Kogoj R, 2018, EUR J CLIN MICROBIOL, V37, P99, DOI 10.1007/s10096-017-3106-5	2018	3	0.5
Kumar S, 2018, INDIAN J PEDIATR, V85, P415, DOI 10.1007/s12098-017-2580-1	2018	3	0.5
Lerch M, 2018, CLIN REV ALLERG IMMU, V54, P177, DOI 10.1007/s12016-017-8667-7	2018	3	0.5
Liu PC, 2018, JPN J INFECT DIS, V71, P39, DOI 10.7883/yoken.JJID.2017.323	2018	3	0.5
Moynihan KM, 2018, PEDIATR INFECT DIS J, V37, PE336, DOI 10.1097/INF.0000000000002029	2018	3	0.5
Nolan VG, 2018, J INFECT DIS, V218, P179, DOI 10.1093/infdis/jix641	2018	3	0.5
Taylor SL, 2018, J ALLERGY CLIN IMMUN, V141, P94, DOI 10.1016/j.jaci.2017.03.044	2018	3	0.5
Troeger C, 2018, LANCET INFECT DIS, V18, P1191, DOI 10.1016/S1473-3099(18)30310-4	2018	3	0.5
Xu Jiang-Jiang, 2018, ZHONGGUO DANG DAI ER KE ZA ZHI, V20, P37	2018	3	0.5
Yuan X, 2018, MEDICINE, V97, P0, DOI 10.1097/MD.0000000000010806	2018	3	0.5
Baker RE, 2020, P NATL ACAD SCI USA, V117, P30547, DOI 10.1073/pnas.2013182117	2020	2	0.5
Corman VM, 2020, EUROSURVEILLANCE, V25, P23, DOI 10.2807/1560-7917.ES.2020.25.3.2000045	2020	2	0.5
Kenri T, 2020, FRONT CELL INFECT MI, V10, P0, DOI 10.3389/fcimb.2020.00385	2020	2	0.5
Shim JY, 2020, CLIN EXP PEDIATR, V63, P469, DOI 10.3345/cep.2019.00360	2020	2	0.5
Dowell SF, 2001, CLIN INFECT DIS, V33, P492, DOI 10.1086/322632	2001	11	0.478261
Christie LJ, 2007, PEDIATRICS, V120, P305, DOI 10.1542/peds.2007-0240	2007	8	0.470588
Kim NH, 2007, PEDIATR INFECT DIS J, V26, P897, DOI 10.1097/INF.0b013e31812e4b81	2007	8	0.470588
Isozumi R, 2009, RESPIROLOGY, V14, P1206, DOI 10.1111/j.1440-1843.2009.01619.x	2009	7	0.466667
Juven T, 2000, PEDIATR INFECT DIS J, V19, P293, DOI 10.1097/00006454-200004000-00006	2000	11	0.458333
Thacker WL, 2000, CLIN DIAGN LAB IMMUN, V7, P778, DOI 10.1128/CDLI.7.5.778-780.2000	2000	11	0.458333
Kurai D, 2013, INFLAMMATION, V36, P285, DOI 10.1007/s10753-012-9545-3	2013	5	0.454545
Daxboeck F, 2004, J CHILD NEUROL, V19, P865, DOI 10.1177/08830738040190110401	2004	9	0.45
Daxboeck F, 2006, CURR OPIN NEUROL, V19, P374, DOI 10.1097/01.wco.0000236617.04958.60	2006	8	0.444444
Bassis CM, 2015, MBIO, V6, P0, DOI 10.1128/mBio.00037-15	2015	4	0.444444
Beigelman A, 2015, J ALLERGY CLIN IMMUN, V135, P1171, DOI 10.1016/j.jaci.2014.10.001	2015	4	0.444444
Kew KM, 2015, COCHRANE DB SYST REV, V0, P0, DOI 10.1002/14651858.CD002997.pub4	2015	4	0.444444
Kogoj R, 2015, EURO SURVEILL, V20, P0	2015	4	0.444444
Zhao F, 2015, PLOS ONE, V10, P0, DOI 10.1371/journal.pone.0141702	2015	4	0.444444
Layani-Milon MP, 1999, J CLIN MICROBIOL, V37, P1721, DOI 10.1128/JCM.37.6.1721-1726.1999	1999	11	0.44
Cilla G, 2008, J MED VIROL, V80, P1843, DOI 10.1002/jmv.21271	2008	7	0.4375
Hamano-Hasegawa Keiko, 2008, JOURNAL OF INFECTION AND CHEMOTHERAPY, V14, P424, DOI 10.1007/s10156-008-0648-6	2008	7	0.4375
Watkins-Riedel T, 2001, DIAGN MICR INFEC DIS, V40, P21, DOI 10.1016/S0732-8893(01)00250-4	2001	10	0.434783
Sutherland ER, 2010, J ALLERGY CLIN IMMUN, V126, P747, DOI 10.1016/j.jaci.2010.07.024	2010	6	0.428571
Durack J, 2017, J ALLERGY CLIN IMMUN, V140, P63, DOI 10.1016/j.jaci.2016.08.055	2017	3	0.428571
Hsu DY, 2017, J AM ACAD DERMATOL, V76, P811, DOI 10.1016/j.jaad.2016.12.024	2017	3	0.428571
Kakuya F, 2017, J PEDIATR-US, V189, P218, DOI 10.1016/j.jpeds.2017.06.038	2017	3	0.428571
Lee KY, 2017, INT J MOL SCI, V18, P0, DOI 10.3390/ijms18020388	2017	3	0.428571
Medina JL, 2017, PLOS ONE, V12, P0, DOI 10.1371/journal.pone.0172447	2017	3	0.428571
Medjo B, 2017, J TROP PEDIATRICS, V63, P294, DOI 10.1093/tropej/fmw091	2017	3	0.428571
Ning GJ, 2017, HUM VACC IMMUNOTHER, V13, P2742, DOI 10.1080/21645515.2017.1371381	2017	3	0.428571
Principi N, 2017, INT J MOL SCI, V18, P0, DOI 10.3390/ijms18020447	2017	3	0.428571
Shi T, 2017, LANCET, V390, P946, DOI 10.1016/S0140-6736(17)30938-8	2017	3	0.428571
Suzuki Y, 2017, JPN J INFECT DIS, V70, P642, DOI 10.7883/yoken.JJID.2017.276	2017	3	0.428571
Troeger C, 2017, LANCET INFECT DIS, V17, P1133, DOI 10.1016/S1473-3099(17)30396-1	2017	3	0.428571
Wang L, 2017, MEDICINE, V96, P0, DOI 10.1097/MD.0000000000009364	2017	3	0.428571
Watkins LKF, 2017, PEDIATR INFECT DIS J, V36, P564, DOI 10.1097/INF.0000000000001476	2017	3	0.428571
Whistler T, 2017, J CLIN MICROBIOL, V55, P2222, DOI 10.1128/JCM.00350-17	2017	3	0.428571
Zhang J, 2017, FUTURE MICROBIOL, V12, P119, DOI 10.2217/fmb-2016-0111	2017	3	0.428571
del Valle-Mendoza J, 2017, PLOS ONE, V12, P0, DOI 10.1371/journal.pone.0170787	2017	3	0.428571
Liu G, 2005, DIAGN MICR INFEC DIS, V52, P7, DOI 10.1016/j.diagmicrobio.2005.01.005	2005	8	0.421053
Raty R, 2005, J MED MICROBIOL, V54, P287, DOI 10.1099/jmm.0.45888-0	2005	8	0.421053
Hong SJ, 2012, ALLERGY ASTHMA IMMUN, V4, P59, DOI 10.4168/aair.2012.4.2.59	2012	5	0.416667
Allander T, 2007, CLIN INFECT DIS, V44, P904, DOI 10.1086/512196	2007	7	0.411765
Bisgaard H, 2007, NEW ENGL J MED, V357, P1487, DOI 10.1056/NEJMoa052632	2007	7	0.411765
Domenech C, 2009, EUR J CLIN MICROBIOL, V28, P91, DOI 10.1007/s10096-008-0591-6	2009	6	0.4
Bebear C, 2014, PEDIATR INFECT DIS J, V33, PE71, DOI 10.1097/INF.0000000000000063	2014	4	0.4
Hao YH, 2014, INFECT IMMUN, V82, P5246, DOI 10.1128/IAI.01989-14	2014	4	0.4
Sauteur PMM, 2014, SWISS MED WKLY, V144, P0, DOI 10.4414/smw.2014.14041	2014	4	0.4
Chou CC, 2019, J MICROBIOL IMMUNOL, V52, P172, DOI 10.1016/j.jmii.2018.11.004	2019	2	0.4
Diaz-Conradi A, 2019, PEDIATR PULM, V54, P517, DOI 10.1002/ppul.24279	2019	2	0.4
Kumar S, 2019, DIAGN MICR INFEC DIS, V95, P5, DOI 10.1016/j.diagmicrobio.2019.03.010	2019	2	0.4
Li JQ, 2019, FRONT PEDIATR, V7, P0, DOI 10.3389/fped.2019.00441	2019	2	0.4
Wang HP, 2019, FRONT PEDIATR, V7, P0, DOI 10.3389/fped.2019.00265	2019	2	0.4
Principi N, 2001, LANCET INFECT DIS, V1, P334, DOI 10.1016/S1473-3099(01)00147-5	2001	9	0.391304
Choi EH, 2006, CLIN INFECT DIS, V43, P585, DOI 10.1086/506350	2006	7	0.388889
Lee KY, 2006, PEDIATR PULM, V41, P263, DOI 10.1002/ppul.20374	2006	7	0.388889
Chalker V, 2011, EURO SURVEILL, V16, P0	2011	5	0.384615
Thurman KA, 2011, DIAGN MICR INFEC DIS, V70, P1, DOI 10.1016/j.diagmicrobio.2010.11.014	2011	5	0.384615
Thumerelle C, 2003, PEDIATR PULM, V35, P75, DOI 10.1002/ppul.10191	2003	8	0.380952
Brittain-Long R, 2008, J CLIN VIROL, V41, P53, DOI 10.1016/j.jcv.2007.10.029	2008	6	0.375
Jackson DJ, 2008, AM J RESP CRIT CARE, V178, P667, DOI 10.1164/rccm.200802-309OC	2008	6	0.375
Kumar S, 2008, J CLIN MICROBIOL, V46, P3063, DOI 10.1128/JCM.00625-08	2008	6	0.375
Akdis M, 2016, J ALLERGY CLIN IMMUN, V138, P984, DOI 10.1016/j.jaci.2016.06.033	2016	3	0.375
Cilloniz C, 2016, INTENS CARE MED, V42, P1374, DOI 10.1007/s00134-016-4394-4	2016	3	0.375
Iramain R, 2016, J ASTHMA, V53, P618, DOI 10.3109/02770903.2015.1116085	2016	3	0.375
Khoury T, 2016, CLIN MICROBIOL INFEC, V22, P711, DOI 10.1016/j.cmi.2016.05.028	2016	3	0.375
Kishaba T, 2016, FRONT MED-LAUSANNE, V3, P0, DOI 10.3389/fmed.2016.00028	2016	3	0.375
Marchello C, 2016, ANN FAM MED, V14, P552, DOI 10.1370/afm.1993	2016	3	0.375
Saraya T, 2016, FRONT MICROBIOL, V7, P0, DOI 10.3389/fmicb.2016.00364	2016	3	0.375
Sauteur PMM, 2016, SWISS MED WKLY, V146, P0, DOI 10.4414/smw.2016.14222	2016	3	0.375
Tanaka H, 2016, FRONT MICROBIOL, V7, P0, DOI 10.3389/fmicb.2016.00695	2016	3	0.375
Wang HP, 2016, VIROL J, V13, P0, DOI 10.1186/s12985-016-0493-7	2016	3	0.375
Wang ZH, 2016, INFLAMMATION, V39, P1871, DOI 10.1007/s10753-016-0422-3	2016	3	0.375
Xu XF, 2016, CYTOKINE, V86, P73, DOI 10.1016/j.cyto.2016.07.018	2016	3	0.375
Guleria R, 2005, J LAB CLIN MED, V146, P55, DOI 10.1016/j.lab.2005.04.006	2005	7	0.368421
Othman N, 2005, J PAEDIATR CHILD H, V41, P671, DOI 10.1111/j.1440-1754.2005.00757.x	2005	7	0.368421
Fitzpatrick M, 2002, THORAX, V57, P1, DOI 10.1136/thorax.57.1.1	2002	8	0.363636
Busson L, 2013, DIAGN MICR INFEC DIS, V76, P133, DOI 10.1016/j.diagmicrobio.2013.02.027	2013	4	0.363636
Chen ZR, 2013, DIAGN MICR INFEC DIS, V77, P362, DOI 10.1016/j.diagmicrobio.2013.09.006	2013	4	0.363636
Chen ZR, 2013, ITAL J PEDIATR, V39, P0, DOI 10.1186/1824-7288-39-34	2013	4	0.363636
Qu JX, 2013, BMC INFECT DIS, V13, P0, DOI 10.1186/1471-2334-13-172	2013	4	0.363636
Winchell JM, 2013, CURR PEDIATR REV, V9, P324, DOI 10.2174/15733963113099990009	2013	4	0.363636
Bisgaard H, 2010, BRIT MED J, V341, P0, DOI 10.1136/bmj.c4978	2010	5	0.357143
Kamizono S, 2010, EUR J PEDIATR, V169, P721, DOI 10.1007/s00431-009-1100-3	2010	5	0.357143
Metz G, 2010, IMMUNOL ALLERGY CLIN, V30, P575, DOI 10.1016/j.iac.2010.08.003	2010	5	0.357143
Kumar S, 2007, CLIN INFECT DIS, V44, P568, DOI 10.1086/511076	2007	6	0.352941
Liu Fang-Ching, 2007, JOURNAL OF MICROBIOLOGY IMMUNOLOGY AND INFECTION, V40, P507	2007	6	0.352941
Yang J, 2004, CYTOKINE GROWTH F R, V15, P157, DOI 10.1016/j.cytogfr.2004.01.001	2004	7	0.35
Dorigo-Zetsma JW, 2001, J INFECT DIS, V183, P675, DOI 10.1086/318529	2001	8	0.347826
Sakoulas G, 2001, PEDIATR INFECT DIS J, V20, P543, DOI 10.1097/00006454-200105000-00016	2001	8	0.347826
Gendrel D, 1997, EUR J CLIN MICROBIOL, V16, P388, DOI 10.1007/BF01726370	1997	9	0.333333
Hardegger D, 2000, J MICROBIOL METH, V41, P45, DOI 10.1016/S0167-7012(00)00135-4	2000	8	0.333333
Bitnun Ari, 2003, SEMIN PEDIATR INFECT DIS, V14, P96, DOI 10.1053/spid.2003.127226	2003	7	0.333333
Somer A, 2006, J TROP PEDIATRICS, V52, P173, DOI 10.1093/tropej/fml017	2006	6	0.333333
Don M, 2009, PEDIATR INT, V51, P91, DOI 10.1111/j.1442-200X.2008.02678.x	2009	5	0.333333
Ambroggio L, 2012, J PEDIATR-US, V161, P1097, DOI 10.1016/j.jpeds.2012.06.067	2012	4	0.333333
Blystad H, 2012, EURO SURVEILL, V17, P0	2012	4	0.333333
Brimberg L, 2012, NEUROPSYCHOPHARMACOL, V37, P2076, DOI 10.1038/npp.2012.56	2012	4	0.333333
Chen Ling-ling, 2012, ZHONGHUA ER KE ZA ZHI, V50, P211	2012	4	0.333333
Eibach D, 2012, EURO SURVEILL, V17, P0	2012	4	0.333333
Gable MS, 2012, CLIN INFECT DIS, V54, P899, DOI 10.1093/cid/cir1038	2012	4	0.333333
Gadsby NJ, 2012, EUROSURVEILLANCE, V17, P15	2012	4	0.333333
Gotoh K, 2012, J INFECT CHEMOTHER, V18, P662, DOI 10.1007/s10156-012-0388-5	2012	4	0.333333
Lozano R, 2012, LANCET, V380, P2095, DOI 10.1016/S0140-6736(12)61728-0	2012	4	0.333333
Nir-Paz R, 2012, EUROSURVEILLANCE, V17, P5	2012	4	0.333333
Polkowska A, 2012, EURO SURVEILL, V17, P20072	2012	4	0.333333
Wang Y, 2012, ANTIMICROB AGENTS CH, V56, P3748, DOI 10.1128/AAC.00142-12	2012	4	0.333333
Blum CA, 2015, LANCET, V385, P1511, DOI 10.1016/S0140-6736(14)62447-8	2015	3	0.333333
Fan Q, 2015, MICROBIOL IMMUNOL, V59, P375, DOI 10.1111/1348-0421.12267	2015	3	0.333333
Huang YJ, 2015, J ALLERGY CLIN IMMUN, V136, P874, DOI 10.1016/j.jaci.2015.05.044	2015	3	0.333333
Kalicki B, 2015, BMC PEDIATR, V15, P0, DOI 10.1186/s12887-015-0357-0	2015	3	0.333333
Katsushima Y, 2015, PEDIATR INT, V57, P247, DOI 10.1111/ped.12513	2015	3	0.333333
Kawamata R, 2015, J INFECT CHEMOTHER, V21, P783, DOI 10.1016/j.jiac.2015.07.009	2015	3	0.333333
Kim Kyu Won, 2015, KOREAN J PEDIATR, V58, P211, DOI 10.3345/kjp.2015.58.6.211	2015	3	0.333333
Liu J, 2015, PLOS ONE, V10, P0, DOI 10.1371/journal.pone.0119170	2015	3	0.333333
Mathew JL, 2015, J GLOB HEALTH, V5, P223, DOI 10.7189/jogh.05.020418	2015	3	0.333333
Nakane D, 2015, PLOS PATHOG, V11, P0, DOI 10.1371/journal.ppat.1005299	2015	3	0.333333
Omori R, 2015, SCI REP-UK, V5, P0, DOI 10.1038/srep14473	2015	3	0.333333
Shao L, 2015, INT J CLIN EXP PATHO, V8, P5263	2015	3	0.333333
Teo SM, 2015, CELL HOST MICROBE, V17, P704, DOI 10.1016/j.chom.2015.03.008	2015	3	0.333333
Wang HP, 2015, INT J CLIN EXP MED, V8, P15011	2015	3	0.333333
Xiao L, 2015, BMC GENOMICS, V16, P0, DOI 10.1186/s12864-015-1801-0	2015	3	0.333333
Yamazaki Tsutomu, 2015, KANSENSHOGAKU ZASSHI, V89, P394	2015	3	0.333333
[中华医学会儿科学分会呼吸学组 Respiratory Branch of Chinese Pediatric], 2015, 中华实用儿科临床杂志 CHINESE JOURNAL OF APPLIED CLINICAL PEDIATRICS, V30, P1304	2015	3	0.333333
Antoon JW, 2018, PEDIATR DERMATOL, V35, P182, DOI 10.1111/pde.13383	2018	2	0.333333
Atay CK, 2018, J MOL LIQ, V269, P315, DOI 10.1016/j.molliq.2018.08.009	2018	2	0.333333
Cao B, 2018, CLIN RESPIR J, V12, P1320, DOI 10.1111/crj.12674	2018	2	0.333333
Dai WK, 2018, EMERG MICROBES INFEC, V7, P0, DOI 10.1038/s41426-018-0097-y	2018	2	0.333333
Dunican EM, 2018, J CLIN INVEST, V128, P997, DOI 10.1172/JCI95693	2018	2	0.333333
Katz SE, 2018, INFECT DIS CLIN N AM, V32, P47, DOI 10.1016/j.idc.2017.11.002	2018	2	0.333333
Liu F, 2018, BIOMED PHARMACOTHER, V107, P1466, DOI 10.1016/j.biopha.2018.07.176	2018	2	0.333333
Miao Q, 2018, CLIN INFECT DIS, V67, PS231, DOI 10.1093/cid/ciy693	2018	2	0.333333
Prince OA, 2018, CELL MICROBIOL, V20, P0, DOI 10.1111/cmi.12810	2018	2	0.333333
Freymuth F, 1999, J CLIN VIROL, V13, P131, DOI 10.1016/S1386-6532(99)00030-X	1999	8	0.32
Petitjean J, 2002, J CLIN MICROBIOL, V40, P165, DOI 10.1128/JCM.40.1.165-171.2002	2002	7	0.318182
Lee KY, 2008, EXPERT REV ANTI-INFE, V6, P509, DOI 10.1586/14787210.6.4.509	2008	5	0.3125
BLOCK S, 1995, PEDIATR INFECT DIS J, V14, P471, DOI 10.1097/00006454-199506000-00002	1995	9	0.310345
Cunningham AF, 1998, EUR RESPIR J, V11, P345, DOI 10.1183/09031936.98.11020345	1998	8	0.307692
Normann E, 1998, ACTA PAEDIATR, V87, P23, DOI 10.1080/08035259850157813	1998	8	0.307692
Almasri M, 2011, HIPPOKRATIA, V15, P147	2011	4	0.307692
Huang YJ, 2011, J ALLERGY CLIN IMMUN, V127, P372, DOI 10.1016/j.jaci.2010.10.048	2011	4	0.307692
Uehara S, 2011, PEDIATR INT, V53, P264, DOI 10.1111/j.1442-200X.2010.03316.x	2011	4	0.307692
Koh YY, 2001, PEDIATRICS, V107, P0, DOI 10.1542/peds.107.3.e39	2001	7	0.304348
Williams JV, 2004, NEW ENGL J MED, V350, P443, DOI 10.1056/NEJMoa025472	2004	6	0.3
Chourasia BK, 2014, BMC MICROBIOL, V14, P0, DOI 10.1186/1471-2180-14-108	2014	3	0.3
Ji M, 2014, J MICROBIOL METH, V102, P32, DOI 10.1016/j.mimet.2014.04.009	2014	3	0.3
Kakuya F, 2014, PEDIATR INT, V56, P547, DOI 10.1111/ped.12327	2014	3	0.3
Kim JH, 2014, ALLERGY ASTHMA IMMUN, V6, P428, DOI 10.4168/aair.2014.6.5.428	2014	3	0.3
Liu WK, 2014, PLOS ONE, V9, P0, DOI 10.1371/journal.pone.0096674	2014	3	0.3
Liu Y, 2014, DIAGN MICR INFEC DIS, V78, P333, DOI 10.1016/j.diagmicrobio.2013.12.002	2014	3	0.3
Musher DM, 2014, NEW ENGL J MED, V371, P1619, DOI 10.1056/NEJMra1312885	2014	3	0.3
Nilsson AC, 2014, SCAND J INFECT DIS, V46, P315, DOI 10.3109/00365548.2013.866268	2014	3	0.3
Owen KA, 2014, PLOS PATHOG, V10, P0, DOI 10.1371/journal.ppat.1004159	2014	3	0.3
Shangguan ZX, 2014, J INFECT DEV COUNTR, V8, P1259, DOI 10.3855/jidc.4721	2014	3	0.3
Wallihan R, 2014, J INFECTION, V69, PS87, DOI 10.1016/j.jinf.2014.07.021	2014	3	0.3
Watanabe H, 2014, ALLERGY ASTHMA PROC, V35, P204, DOI 10.2500/aap.2014.35.3742	2014	3	0.3
Xiao JH, 2014, DIAGN MICR INFEC DIS, V78, P24, DOI 10.1016/j.diagmicrobio.2013.08.008	2014	3	0.3
Yimenicioglu S, 2014, IRAN J PEDIATR, V24, P647	2014	3	0.3
Youn YS, 2014, INFECT CHEMOTHER, V46, P239, DOI 10.3947/ic.2014.46.4.239	2014	3	0.3
Khetsuriani N, 2007, J ALLERGY CLIN IMMUN, V119, P314, DOI 10.1016/j.jaci.2006.08.041	2007	5	0.294118
Miyashita N, 2007, J MED MICROBIOL, V56, P1625, DOI 10.1099/jmm.0.47119-0	2007	5	0.294118
Vervloet LA, 2007, BRAZ J INFECT DIS, V11, P507, DOI 10.1590/S1413-86702007000500012	2007	5	0.294118
Loens K, 2003, J CLIN MICROBIOL, V41, P4915, DOI 10.1128/JCM.41.11.4915-4923.2003	2003	6	0.285714
Vanfleteren I, 2003, PEDIATR DERMATOL, V20, P52, DOI 10.1046/j.1525-1470.2003.03012.x	2003	6	0.285714
Granerod J, 2010, LANCET INFECT DIS, V10, P835, DOI 10.1016/S1473-3099(10)70222-X	2010	4	0.285714
Loens K, 2010, EUR J CLIN MICROBIOL, V29, P1055, DOI 10.1007/s10096-010-0975-2	2010	4	0.285714
Maffey AF, 2010, PEDIATR PULM, V45, P619, DOI 10.1002/ppul.21236	2010	4	0.285714
Al Maani Amal, 2017, OMAN MED J, V32, P396, DOI 10.5001/omj.2017.75	2017	2	0.285714
Bao YX, 2017, CLIN RESPIR J, V11, P931, DOI 10.1111/crj.12439	2017	2	0.285714
Kannan TR, 2006, P NATL ACAD SCI USA, V103, P6724, DOI 10.1073/pnas.0510644103	2006	5	0.277778
Loens K, 2002, J CLIN MICROBIOL, V40, P1339, DOI 10.1128/JCM.40.4.1339-1345.2002	2002	6	0.272727
Pfausler B, 2002, EUR J NEUROL, V9, P93, DOI 10.1046/j.1468-1331.2002.00350.x	2002	6	0.272727
Dumke R, 2013, ANTIMICROB AGENTS CH, V57, P3460, DOI 10.1128/AAC.00706-13	2013	3	0.272727
Garcia AV, 2013, PEDIATR PULM, V48, P98, DOI 10.1002/ppul.22552	2013	3	0.272727
Luchsinger V, 2013, THORAX, V68, P1000, DOI 10.1136/thoraxjnl-2013-203551	2013	3	0.272727
Schmitt BH, 2013, DIAGN MICR INFEC DIS, V77, P202, DOI 10.1016/j.diagmicrobio.2013.07.016	2013	3	0.272727
Subspecialty Group of Respiratory Diseases The Society of Pediatrics Chinese Medical Association, 2013, ZHONGHUA ER KE ZA ZHI, V51, P745	2013	3	0.272727
Tobin-DAngelo M, 2013, MMWR-MORBID MORTAL W, V62, P603	2013	3	0.272727
Wu HM, 2013, J INFECT CHEMOTHER, V19, P782, DOI 10.1007/s10156-012-0523-3	2013	3	0.272727
Bryce J, 2005, LANCET, V365, P1147, DOI 10.1016/S0140-6736(05)71877-8	2005	5	0.263158
Webley WC, 2005, AM J RESP CRIT CARE, V171, P1083, DOI 10.1164/rccm.200407-917OC	2005	5	0.263158
Bitnun A, 2001, CLIN INFECT DIS, V32, P1674, DOI 10.1086/320748	2001	6	0.26087
Dorigo-Zetsma JW, 2001, J CLIN MICROBIOL, V39, P1184, DOI 10.1128/JCM.39.3.1184-1186.2001	2001	6	0.26087
Hammerschlag MR, 2001, CURR OPIN INFECT DIS, V14, P181, DOI 10.1097/00001432-200104000-00012	2001	6	0.26087
Waring AL, 2001, J CLIN MICROBIOL, V39, P1385, DOI 10.1128/JCM.39.4.1385-1390.2001	2001	6	0.26087
Ieven M, 1996, J INFECT DIS, V173, P1445, DOI 10.1093/infdis/173.6.1445	1996	7	0.25
Honda C, 2000, J CLIN MICROBIOL, V38, P1382, DOI 10.1128/JCM.38.4.1382-1384.2000	2000	6	0.25
Kim CK, 2000, PEDIATRICS, V105, P372, DOI 10.1542/peds.105.2.372	2000	6	0.25
Jartti T, 2004, EMERG INFECT DIS, V10, P1095, DOI 10.3201/eid1006.030629	2004	5	0.25
Ercan TE, 2008, J CHILD NEUROL, V23, P338, DOI 10.1177/0883073807308714	2008	4	0.25
Haider BA, 2008, COCHRANE DB SYST REV, V0, P0, DOI 10.1002/14651858.CD005976.pub2	2008	4	0.25
Tamura A, 2008, J INFECTION, V57, P223, DOI 10.1016/j.jinf.2008.06.012	2008	4	0.25
Chen CJ, 2012, PEDIATR INFECT DIS J, V31, PE196, DOI 10.1097/INF.0b013e31826eb5a7	2012	3	0.25
Dumke R, 2012, DIAGN MICR INFEC DIS, V73, P200, DOI 10.1016/j.diagmicrobio.2012.02.014	2012	3	0.25
Hantz S, 2012, J CLIN MICROBIOL, V50, P3402, DOI 10.1128/JCM.01248-12	2012	3	0.25
Honkinen M, 2012, CLIN MICROBIOL INFEC, V18, P300, DOI 10.1111/j.1469-0691.2011.03603.x	2012	3	0.25
Liu Jin-rong, 2012, ZHONGHUA ER KE ZA ZHI, V50, P915	2012	3	0.25
Pereyre S, 2012, EMERG INFECT DIS, V18, P343, DOI 10.3201/eid1802.111379	2012	3	0.25
Waites KB, 2012, J MOL DIAGN, V14, P437, DOI 10.1016/j.jmoldx.2012.06.001	2012	3	0.25
Zhao F, 2012, BIOMED ENVIRON SCI, V25, P77, DOI 10.3967/0895-3988.2012.01.011	2012	3	0.25
Alerhand S, 2016, PEDIATR EMERG CARE, V32, P472, DOI 10.1097/PEC.0000000000000840	2016	2	0.25
Catt CJ, 2016, AM J OPHTHALMOL, V166, P68, DOI 10.1016/j.ajo.2016.03.020	2016	2	0.25
Diaz MH, 2016, OPEN FORUM INFECT DI, V3, P0, DOI 10.1093/ofid/ofw071	2016	2	0.25
Lieberman D, 2003, AM J RESP CRIT CARE, V167, P406, DOI 10.1164/rccm.200209-996OC	2003	5	0.238095
Sotgiu S, 2003, EUR J NEUROL, V10, P165, DOI 10.1046/j.1468-1331.2003.00535.x	2003	5	0.238095
Atkinson M, 2007, THORAX, V62, P1102, DOI 10.1136/thx.2006.074906	2007	4	0.235294
Dumke R, 2007, J CLIN MICROBIOL, V45, P2726, DOI 10.1128/JCM.00321-07	2007	4	0.235294
Nakayama Eiichi, 2007, JOURNAL OF INFECTION AND CHEMOTHERAPY, V13, P305, DOI 10.1007/s10156-007-0535-6	2007	4	0.235294
Souliou E, 2007, EUR J CLIN MICROBIOL, V26, P513, DOI 10.1007/s10096-007-0326-0	2007	4	0.235294
File TM, 1998, INFECT DIS CLIN N AM, V12, P569, DOI 10.1016/S0891-5520(05)70199-9	1998	6	0.230769
Blaschke AJ, 2011, PEDIATR INFECT DIS J, V30, P289, DOI 10.1097/INF.0b013e3182002d14	2011	3	0.230769
Chalker VJ, 2011, EUR J CLIN MICROBIOL, V30, P915, DOI 10.1007/s10096-011-1176-3	2011	3	0.230769
Chalker VJ, 2011, EUROSURVEILLANCE, V16, P2	2011	3	0.230769
Chiang CH, 2011, STROKE, V42, P2940, DOI 10.1161/STROKEAHA.110.608075	2011	3	0.230769
Chung HL, 2011, CYTOKINE, V54, P218, DOI 10.1016/j.cyto.2011.02.008	2011	3	0.230769
Jansen RR, 2011, J CLIN MICROBIOL, V49, P2631, DOI 10.1128/JCM.02094-10	2011	3	0.230769
Kannan TR, 2011, J INFECT DIS, V204, P1596, DOI 10.1093/infdis/jir557	2011	3	0.230769
Xu D, 2011, EUR J PEDIATR, V170, P851, DOI 10.1007/s00431-010-1360-y	2011	3	0.230769
Xu YC, 2011, WORLD J PEDIATR, V7, P240, DOI 10.1007/s12519-011-0318-0	2011	3	0.230769
Zhang L, 2011, INDIAN J MED RES, V134, P270	2011	3	0.230769
Arden KE, 2006, J MED VIROL, V78, P1232, DOI 10.1002/jmv.20689	2006	4	0.222222
Bamba Masahiro, 2006, JOURNAL OF INFECTION AND CHEMOTHERAPY, V12, P36, DOI 10.1007/s10156-005-0422-y	2006	4	0.222222
Broaders SA, 2006, MICROB PATHOGENESIS, V40, P286, DOI 10.1016/j.micpath.2006.03.002	2006	4	0.222222
Klement E, 2006, CLIN INFECT DIS, V43, P1239, DOI 10.1086/508458	2006	4	0.222222
Morozumi M, 2006, CAN J MICROBIOL, V52, P125, DOI 10.1139/W05-118	2006	4	0.222222
Nir-Paz R, 2006, CLIN MICROBIOL INFEC, V12, P685, DOI 10.1111/j.1469-0691.2006.01469.x	2006	4	0.222222
Sloots TP, 2006, J CLIN VIROL, V35, P99, DOI 10.1016/j.jcv.2005.09.008	2006	4	0.222222
Arrieta MC, 2015, SCI TRANSL MED, V7, P0, DOI 10.1126/scitranslmed.aab2271	2015	2	0.222222
Beigelman A, 2015, J ALLERGY CLIN IMMUN, V136, P1129, DOI 10.1016/j.jaci.2015.06.011	2015	2	0.222222
Brown RJ, 2015, FUTURE MICROBIOL, V10, P1793, DOI 10.2217/fmb.15.96	2015	2	0.222222
Nadal D, 2001, DIAGN MICR INFEC DIS, V39, P15, DOI 10.1016/S0732-8893(00)00216-9	2001	5	0.217391
Liu CL, 2010, CHINESE MED J-PEKING, V123, P3444, DOI 10.3760/cma.j.issn.0366-6999.2010.23.013	2010	3	0.214286
Nilsson AC, 2010, BMC INFECT DIS, V10, P0, DOI 10.1186/1471-2334-10-39	2010	3	0.214286
Rasmussen JN, 2010, EURO SURVEILL, V15, P19708	2010	3	0.214286
Spuesens EBM, 2010, J MICROBIOL METH, V82, P214, DOI 10.1016/j.mimet.2010.06.004	2010	3	0.214286
Touati A, 2010, DIAGN MICR INFEC DIS, V68, P103, DOI 10.1016/j.diagmicrobio.2010.05.010	2010	3	0.214286
Tregoning JS, 2010, CLIN MICROBIOL REV, V23, P74, DOI 10.1128/CMR.00032-09	2010	3	0.214286
Leonardi S, 2005, PEDIATR INFECT DIS J, V24, P843, DOI 10.1097/01.inf.0000177284.88356.56	2005	4	0.210526
MacDowell AL, 2005, IMMUNOL ALLERGY CLIN, V25, P45, DOI 10.1016/j.iac.2004.09.011	2005	4	0.210526
Ngeow YF, 2005, INT J INFECT DIS, V9, P144, DOI 10.1016/j.ijid.2004.06.006	2005	4	0.210526
Teig N, 2005, THORAX, V60, P962, DOI 10.1136/thx.2005.041004	2005	4	0.210526
Dallo SF, 2000, MICROB PATHOGENESIS, V29, P301, DOI 10.1006/mpat.2000.0395	2000	5	0.208333
Menendez R, 1999, AM J RESP CRIT CARE, V159, P1868, DOI 10.1164/ajrccm.159.6.9807070	1999	5	0.2
Michelow IC, 2004, J CLIN MICROBIOL, V42, P3339, DOI 10.1128/JCM.42.7.3339-3341.2004	2004	4	0.2
Talkington DF, 2004, CLIN DIAGN LAB IMMUN, V11, P862, DOI 10.1128/CDLI.11.5.862-867.2004	2004	4	0.2
Tsolia MN, 2004, CLIN INFECT DIS, V39, P681, DOI 10.1086/422996	2004	4	0.2
Cevey-Macherel M, 2009, EUR J PEDIATR, V168, P1429, DOI 10.1007/s00431-009-0943-y	2009	3	0.2
Kurz H, 2009, PEDIATR PULM, V44, P873, DOI 10.1002/ppul.21059	2009	3	0.2
Loens K, 2009, J CLIN MICROBIOL, V47, P21, DOI 10.1128/JCM.02037-08	2009	3	0.2
du Prel JB, 2009, CLIN INFECT DIS, V49, P861, DOI 10.1086/605435	2009	3	0.2
Aizawa Y, 2014, J MED MICROBIOL, V63, P248, DOI 10.1099/jmm.0.068288-0	2014	2	0.2
Andersson ME, 2014, SCAND J INFECT DIS, V46, P897, DOI 10.3109/00365548.2014.951681	2014	2	0.2
Balish MF, 2014, J BACTERIOL, V196, P3675, DOI 10.1128/JB.01865-14	2014	2	0.2
Bozzola E, 2014, ITAL J PEDIATR, V40, P0, DOI 10.1186/1824-7288-40-57	2014	2	0.2
Bradley JS, 2014, PEDIATRICS, V134, PE146, DOI 10.1542/peds.2013-3636	2014	2	0.2
Hahn DL, 1998, ANN ALLERG ASTHMA IM, V81, P339, DOI 10.1016/S1081-1206(10)63126-2	1998	5	0.192308
Dakhama A, 2003, AM J RESP CELL MOL, V29, P344, DOI 10.1165/rcmb.2002-0291OC	2003	4	0.190476
Hardy RD, 2003, ANTIMICROB AGENTS CH, V47, P1614, DOI 10.1128/AAC.47.5.1614-1620.2003	2003	4	0.190476
WAITES KB, 2003, MANUAL CLIN MICROBIO, V0, P972	2003	4	0.190476
Kelly JT, 2008, J ALLERGY CLIN IMMUN, V122, P671, DOI 10.1016/j.jaci.2008.08.013	2008	3	0.1875
Xepapadaki Paraskevi, 2008, ALLERGY ASTHMA CLIN IMMUNOL, V4, P111, DOI 10.1186/1710-1492-4-3-111	2008	3	0.1875
Yis U, 2008, EUR J PEDIATR, V167, P973, DOI 10.1007/s00431-008-0714-1	2008	3	0.1875
Corne JM, 2002, LANCET, V359, P831, DOI 10.1016/S0140-6736(02)07953-9	2002	4	0.181818
Esposito S, 2002, PEDIATR PULM, V34, P122, DOI 10.1002/ppul.10139	2002	4	0.181818
Hardy RD, 2002, INFECT IMMUN, V70, P649, DOI 10.1128/IAI.70.2.649-654.2002	2002	4	0.181818
Hoek KL, 2002, J ALLERGY CLIN IMMUN, V109, P470, DOI 10.1067/mai.2002.121951	2002	4	0.181818
Lieberman D, 2002, DIAGN MICR INFEC DIS, V44, P1, DOI 10.1016/S0732-8893(02)00421-2	2002	4	0.181818
Tanaka H, 2002, CHEST, V121, P1493, DOI 10.1378/chest.121.5.1493	2002	4	0.181818
Tondella MLC, 2002, J CLIN MICROBIOL, V40, P575, DOI 10.1128/JCM.40.2.575-583.2002	2002	4	0.181818
Waites K.B., 2002, MANUAL COMMERCIAL ME, V0, P201	2002	4	0.181818
von Hertzen LC, 2002, EUR RESPIR J, V19, P546, DOI 10.1183/09031936.02.00254402	2002	4	0.181818
Bao Fang, 2013, ZHONGHUA JIE HE HE HU XI ZA ZHI, V36, P756	2013	2	0.181818
Blyth CC, 2013, INFLUENZA OTHER RESP, V7, P168, DOI 10.1111/j.1750-2659.2012.00360.x	2013	2	0.181818
Bosch AATM, 2013, PLOS PATHOG, V9, P0, DOI 10.1371/journal.ppat.1003057	2013	2	0.181818
Caliskan M, 2013, NEW ENGL J MED, V368, P1398, DOI 10.1056/NEJMoa1211592	2013	2	0.181818
Esposito S, 2013, INFLUENZA OTHER RESP, V7, P18, DOI 10.1111/j.1750-2659.2012.00340.x	2013	2	0.181818
Goleva E, 2013, AM J RESP CRIT CARE, V188, P1193, DOI 10.1164/rccm.201304-0775OC	2013	2	0.181818
Jartti T, 2013, PAEDIATR RESPIR REV, V14, P38, DOI 10.1016/j.prrv.2012.04.002	2013	2	0.181818
Lai CH, 2013, PLOS ONE, V8, P0, DOI 10.1371/journal.pone.0077640	2013	2	0.181818
Annagur A, 2007, J TROP PEDIATRICS, V53, P313, DOI 10.1093/tropej/fmm040	2007	3	0.176471
Grijalva CG, 2007, LANCET, V369, P1179, DOI 10.1016/S0140-6736(07)60564-9	2007	3	0.176471
Kano Y, 2007, J AM ACAD DERMATOL, V57, PS33, DOI 10.1016/j.jaad.2005.08.027	2007	3	0.176471
Kusel MMH, 2007, J ALLERGY CLIN IMMUN, V119, P1105, DOI 10.1016/j.jaci.2006.12.669	2007	3	0.176471
Nisar N, 2007, POSTGRAD MED J, V83, P100, DOI 10.1136/pgmj.2006.049023	2007	3	0.176471
Sidal M, 2007, J TROP PEDIATRICS, V53, P225, DOI 10.1093/tropej/fmm003	2007	3	0.176471
Sutherland ER, 2007, CHEST, V132, P1962, DOI 10.1378/chest.06-2415	2007	3	0.176471
Esposito S, 2001, EUR RESPIR J, V17, P241, DOI 10.1183/09031936.01.17202410	2001	4	0.173913
Gencay M, 2001, AM J RESP CRIT CARE, V163, P1097, DOI 10.1164/ajrccm.163.5.2003162	2001	4	0.173913
Martin RJ, 2001, AM J RESP CELL MOL, V24, P577, DOI 10.1165/ajrcmb.24.5.4315	2001	4	0.173913
Okazaki N, 2001, MICROBIOL IMMUNOL, V45, P617, DOI 10.1111/j.1348-0421.2001.tb01293.x	2001	4	0.173913
Padovan CS, 2001, CLIN INFECT DIS, V33, PE119, DOI 10.1086/323461	2001	4	0.173913
Socan M, 2001, CLIN INFECT DIS, V32, PE31, DOI 10.1086/318446	2001	4	0.173913
Amayasu H, 2000, ANN ALLERG ASTHMA IM, V84, P594, DOI 10.1016/S1081-1206(10)62409-X	2000	4	0.166667
Ball TM, 2000, NEW ENGL J MED, V343, P538, DOI 10.1056/NEJM200008243430803	2000	4	0.166667
Gucuyener K., 2000, INDIAN JOURNAL OF PEDIATRICS, V67, P467, DOI 10.1007/BF02859473	2000	4	0.166667
Lehtinen P, 2006, EUR J CLIN MICROBIOL, V25, P463, DOI 10.1007/s10096-006-0166-3	2006	3	0.166667
Pitcher D, 2006, J MED MICROBIOL, V55, P149, DOI 10.1099/jmm.0.46281-0	2006	3	0.166667
Tsiodras S, 2006, EUR J NEUROL, V13, P112, DOI 10.1111/j.1468-1331.2006.01174.x	2006	3	0.166667
Yamazaki T, 2006, CLIN VACCINE IMMUNOL, V13, P708, DOI 10.1128/CVI.00413-05	2006	3	0.166667
Akinbami Lara J, 2012, NCHS DATA BRIEF, V0, P1	2012	2	0.166667
Chang ML, 2012, PEDIATR EMERG CARE, V28, P990, DOI 10.1097/PEC.0b013e31826ca980	2012	2	0.166667
Cho MC, 2012, ANN LAB MED, V32, P133, DOI 10.3343/alm.2012.32.2.126	2012	2	0.166667
El-Dairi Mays A, 2012, INT OPHTHALMOL CLIN, V52, P29, DOI 10.1097/IIO.0b013e318259dec6	2012	2	0.166667
Esposito S, 2012, CURR OPIN INFECT DIS, V25, P286, DOI 10.1097/QCO.0b013e328352b60c	2012	2	0.166667
Feikin DR, 2012, PLOS ONE, V7, P0, DOI 10.1371/journal.pone.0043656	2012	2	0.166667
Gadsby NJ, 2012, EURO SURVEILL, V17, P0	2012	2	0.166667
Good JT, 2012, CURR OPIN PULM MED, V18, P76, DOI 10.1097/MCP.0b013e32834daff8	2012	2	0.166667
Hai LT, 2012, EMERG INFECT DIS, V18, P1886, DOI 10.3201/eid1811.120607	2012	2	0.166667
Han MK, 2012, THORAX, V67, P456, DOI 10.1136/thoraxjnl-2011-201183	2012	2	0.166667
Heederik D, 2012, J ALLERGY CLIN IMMUN, V130, P44, DOI 10.1016/j.jaci.2012.01.067	2012	2	0.166667
Hoffmann J, 2012, PLOS ONE, V7, P0, DOI 10.1371/journal.pone.0043666	2012	2	0.166667
Hsieh YC, 2012, PEDIATR INFECT DIS J, V31, P208, DOI 10.1097/INF.0b013e318234597c	2012	2	0.166667
Jacobs E, 2012, EUROSURVEILLANCE, V17, P2	2012	2	0.166667
Jartti T, 2012, REV MED VIROL, V22, P46, DOI 10.1002/rmv.720	2012	2	0.166667
Jin Y, 2012, CLIN MICROBIOL INFEC, V18, P74, DOI 10.1111/j.1469-0691.2011.03541.x	2012	2	0.166667
Koutsoubari I, 2012, PEDIAT ALLERG IMM-UK, V23, P385, DOI 10.1111/j.1399-3038.2012.01280.x	2012	2	0.166667
Lenglet A, 2012, EURO SURVEILL, V17, P0	2012	2	0.166667
Levine OS, 2012, CLIN INFECT DIS, V54, PS93, DOI 10.1093/cid/cir1052	2012	2	0.166667
Liang H, 2012, EUR J PEDIATR, V171, P559, DOI 10.1007/s00431-011-1609-0	2012	2	0.166667
Linde A, 2012, EURO SURVEILL, V17, P0	2012	2	0.166667
Liu L, 2012, LANCET, V379, P2151, DOI 10.1016/S0140-6736(12)60560-1	2012	2	0.166667
Dionisio D, 1999, SCAND J INFECT DIS, V31, P506, DOI 10.1080/00365549950164067	1999	4	0.16
Dorigo-Zetsma JW, 1999, J MED MICROBIOL, V48, P1115, DOI 10.1099/00222615-48-12-1115	1999	4	0.16
Grondahl B, 1999, J CLIN MICROBIOL, V37, P1	1999	4	0.16
Heiskanen-Kosma T, 1999, SCAND J INFECT DIS, V31, P255, DOI 10.1080/00365549950163536	1999	4	0.16
Said MH, 1999, PEDIATR NEPHROL, V13, P39, DOI 10.1007/s004670050559	1999	4	0.16
Bebear C. M., 2005, CURRENT DRUG TARGETS - INFECTIOUS DISORDERS, V5, P263, DOI 10.2174/1568005054880109	2005	3	0.157895
Schalock PC, 2005, J AM ACAD DERMATOL, V52, P312, DOI 10.1016/j.jaad.2004.07.044	2005	3	0.157895
Waites KB, 2005, CLIN MICROBIOL REV, V18, P757, DOI 10.1128/CMR.18.4.757-789.2005	2005	3	0.157895
Woo PCY, 2005, J VIROL, V79, P884, DOI 10.1128/JVI.79.2.884-895.2005	2005	3	0.157895
Hahn DL, 1998, ANN ALLERG ASTHMA IM, V80, P45, DOI 10.1016/S1081-1206(10)62938-9	1998	4	0.153846
Normann E, 1998, PEDIATR INFECT DIS J, V17, P474, DOI 10.1097/00006454-199806000-00007	1998	4	0.153846
Bae JW, 2011, CASE REP NEUROL, V3, P109, DOI 10.1159/000328836	2011	2	0.153846
Bos-Veneman NGP, 2011, BRAIN BEHAV IMMUN, V25, P532, DOI 10.1016/j.bbi.2010.12.003	2011	2	0.153846
Brilot F, 2011, NEUROLOGY, V76, P1508, DOI 10.1212/WNL.0b013e3182181090	2011	2	0.153846
Charlson ES, 2011, AM J RESP CRIT CARE, V184, P957, DOI 10.1164/rccm.201104-0655OC	2011	2	0.153846
Dalmau J, 2011, LANCET NEUROL, V10, P63, DOI 10.1016/S1474-4422(10)70253-2	2011	2	0.153846
Ege MJ, 2011, NEW ENGL J MED, V364, P701, DOI 10.1056/NEJMoa1007302	2011	2	0.153846
Erb-Downward JR, 2011, PLOS ONE, V6, P0, DOI 10.1371/journal.pone.0016384	2011	2	0.153846
Finkelstein Y, 2011, PEDIATRICS, V128, P723, DOI 10.1542/peds.2010-3322	2011	2	0.153846
Gavala ML, 2011, IMMUNOL REV, V242, P69, DOI 10.1111/j.1600-065X.2011.01031.x	2011	2	0.153846
Harris M, 2011, THORAX, V56, P0	2011	2	0.153846
Hawkins S, 2011, CURR OPIN PEDIATR, V23, P126, DOI 10.1097/MOP.0b013e328341579c	2011	2	0.153846
Hersh AL, 2011, PEDIATRICS, V128, P1053, DOI 10.1542/peds.2011-1337	2011	2	0.153846
Hirao S, 2011, FEMS IMMUNOL MED MIC, V62, P182, DOI 10.1111/j.1574-695X.2011.00799.x	2011	2	0.153846
Hsieh YC, 2011, PEDIATR INFECT DIS J, V30, P740, DOI 10.1097/INF.0b013e31821b10c3	2011	2	0.153846
Huong TTV, 2011, PEDIATR INFECT DIS J, V30, P11, DOI 10.1097/INF.0b013e3181f111a2	2011	2	0.153846
Iwane MK, 2011, J INFECT DIS, V204, P1702, DOI 10.1093/infdis/jir634	2011	2	0.153846
Kicinski P, 2011, ADV MED SCI-POLAND, V56, P56, DOI 10.2478/v10039-011-0017-z	2011	2	0.153846
Kunimi Yuko, 2011, ALLERGOLOGY INTERNATIONAL, V60, P525, DOI 10.2332/allergolint.11-OA-0309	2011	2	0.153846
Lin JJ, 2011, EPILEPSIA, V52, P1979, DOI 10.1111/j.1528-1167.2011.03218.x	2011	2	0.153846
Chen Chun-Jung, 2004, JOURNAL OF MICROBIOLOGY IMMUNOLOGY AND INFECTION, V37, P128	2004	3	0.15
Meloni F, 2004, J CHEMOTHERAPY, V16, P70, DOI 10.1179/joc.2004.16.1.70	2004	3	0.15
Templeton KE, 2004, J CLIN MICROBIOL, V42, P1564, DOI 10.1128/JCM.42.4.1564-1569.2004	2004	3	0.15
Apfalter P, 2003, J CLIN MICROBIOL, V41, P592, DOI 10.1128/JCM.41.2.592-600.2003	2003	3	0.142857
Dumke R, 2003, INT J MED MICROBIOL, V292, P513, DOI 10.1078/1438-4221-00231	2003	3	0.142857
Lemanske RF, 2003, CHEST, V123, P385S, DOI 10.1378/chest.123.3, suppl.385S-a	2003	3	0.142857
Aguerre V, 2010, PEDIATR PULM, V45, P1180, DOI 10.1002/ppul.21304	2010	2	0.142857
Berkley JA, 2010, JAMA-J AM MED ASSOC, V303, P2051, DOI 10.1001/jama.2010.675	2010	2	0.142857
Bilkis MD, 2010, PEDIATR EMERG CARE, V26, P399, DOI 10.1097/PEC.0b013e3181e05779	2010	2	0.142857
Bitnun Ari, 2010, CURR INFECT DIS REP, V12, P282, DOI 10.1007/s11908-010-0105-4	2010	2	0.142857
Black RE, 2010, LANCET, V375, P1969, DOI 10.1016/S0140-6736(10)60549-1	2010	2	0.142857
Brittain-Long R, 2010, J CLIN VIROL, V47, P263, DOI 10.1016/j.jcv.2009.12.010	2010	2	0.142857
Carvalho MD, 2010, J CLIN MICROBIOL, V48, P1611, DOI 10.1128/JCM.02243-09	2010	2	0.142857
Chang AB, 2010, MED J AUSTRALIA, V193, P356, DOI 10.5694/j.1326-5377.2010.tb03949.x	2010	2	0.142857
Don M, 2010, ACTA PAEDIATR, V99, P1602, DOI 10.1111/j.1651-2227.2010.01924.x	2010	2	0.142857
Fowler A, 2010, PEDIATRICS, V126, PE828, DOI 10.1542/peds.2009-3188	2010	2	0.142857
Franz A, 2010, J CLIN VIROL, V48, P239, DOI 10.1016/j.jcv.2010.05.007	2010	2	0.142857
Friedlander AL, 2010, CHEST, V138, P1202, DOI 10.1378/chest.10-0196	2010	2	0.142857
Gern JE, 2010, J VIROL, V84, P7418, DOI 10.1128/JVI.02290-09	2010	2	0.142857
Granerod J, 2010, EPIDEMIOL INFECT, V138, P783, DOI 10.1017/S0950268810000725	2010	2	0.142857
Grijalva CG, 2010, CLIN INFECT DIS, V50, P805, DOI 10.1086/650573	2010	2	0.142857
Javed S, 2010, INDIAN J MED RES, V131, P92	2010	2	0.142857
Kashyap S, 2010, LUNG INDIA, V27, P75, DOI 10.4103/0970-2113.63611	2010	2	0.142857
Kim CK, 2010, J KOREAN MED SCI, V25, P342, DOI 10.3346/jkms.2010.25.3.342	2010	2	0.142857
Leonardi S, 2010, EUR J PEDIATR, V169, P1413, DOI 10.1007/s00431-010-1223-6	2010	2	0.142857
Li STT, 2010, PEDIATRICS, V125, P26, DOI 10.1542/peds.2009-0184	2010	2	0.142857
Mulholland S, 2010, COCHRANE DB SYST REV, V0, P0, DOI 10.1002/14651858.CD004875.pub3	2010	2	0.142857
JANTOS CA, 1995, PEDIATR INFECT DIS J, V14, P117, DOI 10.1097/00006454-199502000-00007	1995	4	0.137931
Esposito S, 2002, EUR J CLIN MICROBIOL, V21, P607, DOI 10.1007/s10096-002-0780-7	2002	3	0.136364
Principi N, 2002, CURR OPIN INFECT DIS, V15, P295, DOI 10.1097/00001432-200206000-00013	2002	3	0.136364
Wadowsky RM, 2002, J CLIN MICROBIOL, V40, P637, DOI 10.1128/JCM.40.2.637-640.2002	2002	3	0.136364
Blasi F, 2009, CLIN MICROBIOL INFEC, V15, P29, DOI 10.1111/j.1469-0691.2008.02130.x	2009	2	0.133333
Evans A. S., 2009, MORBIDITY AND MORTALITY WEEKLY REPORT, V58, P773	2009	2	0.133333
Greer RM, 2009, J CLIN VIROL, V45, P10, DOI 10.1016/j.jcv.2009.03.008	2009	2	0.133333
Hardy RD, 2009, PLOS ONE, V4, P0, DOI 10.1371/journal.pone.0007562	2009	2	0.133333
Levi N, 2009, PEDIATRICS, V123, PE297, DOI 10.1542/peds.2008-1923	2009	2	0.133333
Lim WS, 2009, THORAX, V64, P1, DOI 10.1136/thx.2009.121434	2009	2	0.133333
Marra F, 2009, PEDIATRICS, V123, P1003, DOI 10.1542/peds.2008-1146	2009	2	0.133333
Miller EK, 2009, J ALLERGY CLIN IMMUN, V123, P98, DOI 10.1016/j.jaci.2008.10.007	2009	2	0.133333
Miyashita Naoyuki, 2009, BMC MED IMAGING, V9, P7, DOI 10.1186/1471-2342-9-7	2009	2	0.133333
Mogensen TH, 2009, CLIN MICROBIOL REV, V22, P240, DOI 10.1128/CMR.00046-08	2009	2	0.133333
Nguipdop Djomo P, 2009, THESIS U LONDON LOND, V0, P0	2009	2	0.133333
Peng D, 2009, VIROL J, V6, P0, DOI 10.1186/1743-422X-6-155	2009	2	0.133333
Kenny GE, 2001, ANTIMICROB AGENTS CH, V45, P2604, DOI 10.1128/AAC.45.9.2604-2608.2001	2001	3	0.130435
Moulin F, 2001, ARCH DIS CHILD, V84, P332, DOI 10.1136/adc.84.4.332	2001	3	0.130435
Talkington DE, 2001, EMERGING INFECTIONS 5, V0, P57	2001	3	0.130435
van den Hoogen BG, 2001, NAT MED, V7, P719, DOI 10.1038/89098	2001	3	0.130435
Bartlett John G., 2000, CLINICAL INFECTIOUS DISEASES, V31, P347, DOI 10.1086/313954	2000	3	0.125
Bartlett NW, 2008, NAT MED, V14, P199, DOI 10.1038/nm1713	2008	2	0.125
Bisgaard H, 2008, AM J RESP CRIT CARE, V178, P854, DOI 10.1164/rccm.200706-910OC	2008	2	0.125
Brand PLP, 2008, EUR RESPIR J, V32, P1096, DOI 10.1183/09031936.00002108	2008	2	0.125
Chmura K, 2008, AM J PHYSIOL-LUNG C, V295, PL220, DOI 10.1152/ajplung.90204.2008	2008	2	0.125
Daoud A, 2008, ALLERGY ASTHMA PROC, V29, P286, DOI 10.2500/aap.2008.29.3121	2008	2	0.125
Don M, 2008, PEDIATR NEPHROL, V23, P2247, DOI 10.1007/s00467-008-0910-2	2008	2	0.125
Eun BW, 2008, J INFECTION, V56, P326, DOI 10.1016/j.jinf.2008.02.018	2008	2	0.125
Ferrari M, 2008, J PSYCHIATR RES, V43, P24, DOI 10.1016/j.jpsychires.2008.01.014	2008	2	0.125
Finelli L, 2008, PEDIATRICS, V122, P805, DOI 10.1542/peds.2008-1336	2008	2	0.125
Hassan J, 2008, HUM IMMUNOL, V69, P851, DOI 10.1016/j.humimm.2008.09.003	2008	2	0.125
Kenri T, 2008, J MED MICROBIOL, V57, P469, DOI 10.1099/jmm.0.47634-0	2008	2	0.125
Kjaer BB, 2008, PEDIATR PULM, V43, P567, DOI 10.1002/ppul.20813	2008	2	0.125
Korppi M, 2008, ACTA PAEDIATR, V97, P943, DOI 10.1111/j.1651-2227.2008.00789.x	2008	2	0.125
Kraft M, 2008, EUR RESPIR J, V31, P43, DOI 10.1183/09031936.00103307	2008	2	0.125
Lee PI, 2008, J MICROBIOL IMMUNOL, V41, P54	2008	2	0.125
Liu FC, 2008, JPN J INFECT DIS, V61, P397	2008	2	0.125
Lu YJ, 2008, J MICROBIOL IMMUNOL, V41, P307	2008	2	0.125
Mahony JB, 2008, CLIN MICROBIOL REV, V21, P716, DOI 10.1128/CMR.00037-07	2008	2	0.125
Otomo S, 2008, APMIS, V116, P477, DOI 10.1111/j.1600-0463.2008.00973.x	2008	2	0.125
Wu Q, 2008, AM J RESP CRIT CARE, V177, P720, DOI 10.1164/rccm.200709-1387OC	2008	2	0.125
Sopena N, 1999, EUR J CLIN MICROBIOL, V18, P852, DOI 10.1007/s100960050419	1999	3	0.12
Atkinson M, 2007, EXPERT OPIN PHARMACO, V8, P1091, DOI 10.1517/14656566.8.8.1091	2007	2	0.117647
Blumer N, 2007, CLIN EXP ALLERGY, V37, P348, DOI 10.1111/j.1365-2222.2007.02671.x	2007	2	0.117647
Bosis S, 2007, J CLIN VIROL, V38, P251, DOI 10.1016/j.jcv.2006.11.014	2007	2	0.117647
Bradley JS, 2007, PEDIATR INFECT DIS J, V26, P868, DOI 10.1097/INF.0b013e3180cbd2c7	2007	2	0.117647
Carter MJ, 2007, J MED MICROBIOL, V56, P875, DOI 10.1099/jmm.0.47124-0	2007	2	0.117647
Chan YR, 2007, CURR OPIN INFECT DIS, V20, P157, DOI 10.1097/QCO.0b013e32808255f1	2007	2	0.117647
Chaudhry R, 2007, FRONT BIOSCI-LANDMRK, V12, P690, DOI 10.2741/2093	2007	2	0.117647
Cheuk DKL, 2007, PEDIATR INFECT DIS J, V26, P995, DOI 10.1097/INF.0b013e3181586b63	2007	2	0.117647
Chiang WC, 2007, RESPIROLOGY, V12, P254, DOI 10.1111/j.1440-1843.2006.01036.x	2007	2	0.117647
Chu HW, 2007, J IMMUNOL, V179, P3995, DOI 10.4049/jimmunol.179.6.3995	2007	2	0.117647
Clark JE, 2007, ARCH DIS CHILD, V92, P394, DOI 10.1136/adc.2006.097402	2007	2	0.117647
Clark JE, 2007, EPIDEMIOL INFECT, V135, P262, DOI 10.1017/S0950268806006741	2007	2	0.117647
Don M, 2007, SCAND J INFECT DIS, V39, P129, DOI 10.1080/00365540600951283	2007	2	0.117647
Fry AM, 2007, J INFECT DIS, V195, P1038, DOI 10.1086/512163	2007	2	0.117647
Harnden A, 2007, ARCH DIS CHILD, V92, P594, DOI 10.1136/adc.2007.116665	2007	2	0.117647
Huong PLT, 2007, JPN J INFECT DIS, V60, P370	2007	2	0.117647
Kozyrskyj AL, 2007, CHEST, V131, P1753, DOI 10.1378/chest.06-3008	2007	2	0.117647
Kung CM, 2007, JPN J INFECT DIS, V60, P352	2007	2	0.117647
Lambert SB, 2007, PEDIATRICS, V120, Pe929, DOI 10.1542/peds.2006-3703	2007	2	0.117647
Lee WM, 2007, PLOS ONE, V2, P0, DOI 10.1371/journal.pone.0000966	2007	2	0.117647
Mahony J, 2007, J CLIN MICROBIOL, V45, P2965, DOI 10.1128/JCM.02436-06	2007	2	0.117647
Morikawa A, 2007, PEDIATR INT, V49, P1023, DOI 10.1111/j.1442-200X.2007.02462.x	2007	2	0.117647
National Heart Lung and Blood Institute, 2007, 3 NAT HEART LUNG BLO, V0, P0	2007	2	0.117647
Okazaki N, 2007, JPN J INFECT DIS, V60, P325	2007	2	0.117647
Piacentini GL, 2007, ALLERGY ASTHMA PROC, V28, P194, DOI 10.2500/aap.2007.28.2958	2007	2	0.117647
Ravin KA, 2007, PEDIATRICS, V119, PE1002, DOI 10.1542/peds.2006-2401	2007	2	0.117647
Salvatore CM, 2007, INFECT IMMUN, V75, P236, DOI 10.1128/IAI.01249-06	2007	2	0.117647
Kolski H, 1998, CLIN INFECT DIS, V26, P398, DOI 10.1086/516301	1998	3	0.115385
Korppi M, 1998, PEDIATR INFECT DIS J, V17, P992, DOI 10.1097/00006454-199811000-00005	1998	3	0.115385
Razin S, 1998, MICROBIOL MOL BIOL R, V62, P1094, DOI 10.1128/MMBR.62.4.1094-1156.1998	1998	3	0.115385
Verkooyen RP, 1998, J CLIN MICROBIOL, V36, P2301, DOI 10.1128/JCM.36.8.2301-2307.1998	1998	3	0.115385
Vuori E, 1998, CLIN INFECT DIS, V27, P566, DOI 10.1086/514697	1998	3	0.115385
Falck G, 1997, PEDIATR INFECT DIS J, V16, P549, DOI 10.1097/00006454-199706000-00003	1997	3	0.111111
Butun Y, 2006, TUBERK TORAK, V54, P254	2006	2	0.111111
Cimolai N, 2006, PEDIATR PULM, V41, P1008, DOI 10.1002/ppul.20424	2006	2	0.111111
Contoli M, 2006, NAT MED, V12, P1023, DOI 10.1038/nm1462	2006	2	0.111111
Cunha BA, 2006, CLIN MICROBIOL INFEC, V12, P12, DOI 10.1111/j.1469-0691.2006.01393.x	2006	2	0.111111
Dumke R, 2006, J CLIN MICROBIOL, V44, P2567, DOI 10.1128/JCM.00495-06	2006	2	0.111111
Esposito S, 2006, CLIN INFECT DIS, V43, P206, DOI 10.1086/505120	2006	2	0.111111
Esposito S, 2006, J MED VIROL, V78, P1609, DOI 10.1002/jmv.20745	2006	2	0.111111
Greenberg D, 2006, LANCET INFECT DIS, V6, P529, DOI 10.1016/S1473-3099(06)70553-9	2006	2	0.111111
Hahn DL, 2006, PLOS CLIN TRIALS, V1, P0, DOI 10.1371/journal.pctr.0010011	2006	2	0.111111
Harju TH, 2006, THORAX, V61, P579, DOI 10.1136/thx.2005.056291	2006	2	0.111111
Klig JE, 2006, CURR OPIN PEDIATR, V18, P71, DOI 10.1097/01.mpo.0000192520.48411.fa	2006	2	0.111111
Kusel MMH, 2006, PEDIATR INFECT DIS J, V25, P680, DOI 10.1097/01.inf.0000226912.88900.a3	2006	2	0.111111
Kuypers J, 2006, J CLIN MICROBIOL, V44, P2382, DOI 10.1128/JCM.00216-06	2006	2	0.111111
Lau SKP, 2006, J CLIN MICROBIOL, V44, P2063, DOI 10.1128/JCM.02614-05	2006	2	0.111111
Le Monnier A, 2006, CLIN INFECT DIS, V42, P1135, DOI 10.1086/502680	2006	2	0.111111
Lee I, 2006, EUR RADIOL, V16, P719, DOI 10.1007/s00330-005-0026-z	2006	2	0.111111
Liu You-ning, 2006, ZHONGHUA JIEHE HE HUXI ZAZHI, V29, P3	2006	2	0.111111
Lu XY, 2006, J CLIN MICROBIOL, V44, P3231, DOI 10.1128/JCM.00889-06	2006	2	0.111111
Manning A, 2006, J INFECT DIS, V194, P1283, DOI 10.1086/508219	2006	2	0.111111
Martin RJ, 2006, CLIN CHEST MED, V27, P87, DOI 10.1016/j.ccm.2005.10.004	2006	2	0.111111
Nambu A, 2006, RADIOLOGY, V238, P330, DOI 10.1148/radiol.2381040088	2006	2	0.111111
Tanir G, 2006, TURKISH J PEDIATR, V48, P166	2006	2	0.111111
Alexander TS, 1996, J CLIN MICROBIOL, V34, P1180, DOI 10.1128/JCM.34.5.1180-1183.1996	1996	3	0.107143
Allander T, 2005, P NATL ACAD SCI USA, V102, P12891, DOI 10.1073/pnas.0504666102	2005	2	0.105263
Blasi F, 2005, SEMIN RESP CRIT CARE, V26, P617, DOI 10.1055/s-2005-925525	2005	2	0.105263
Cherian T, 2005, B WORLD HEALTH ORGAN, V83, P353	2005	2	0.105263
Darville Toni, 2005, SEMIN PEDIATR INFECT DIS, V16, P235, DOI 10.1053/j.spid.2005.06.004	2005	2	0.105263
Don M, 2005, SCAND J INFECT DIS, V37, P806, DOI 10.1080/00365540500262435	2005	2	0.105263
Falsey AR, 2005, NEW ENGL J MED, V352, P1749, DOI 10.1056/NEJMoa043951	2005	2	0.105263
Lauderdale TL, 2005, RESP MED, V99, P1079, DOI 10.1016/j.rmed.2005.02.026	2005	2	0.105263
Leckman JF, 2005, BIOL PSYCHIAT, V57, P667, DOI 10.1016/j.biopsych.2004.12.004	2005	2	0.105263
Lemanske RF, 2005, J ALLERGY CLIN IMMUN, V116, P571, DOI 10.1016/j.jaci.2005.06.024	2005	2	0.105263
McDonough EA, 2005, MOL CELL PROBE, V19, P314, DOI 10.1016/j.mcp.2005.05.002	2005	2	0.105263
Narita M, 2005, PEDIATR NEUROL, V33, P105, DOI 10.1016/j.pediatrneurol.2005.03.003	2005	2	0.105263
Okada F, 2005, J COMPUT ASSIST TOMO, V29, P626, DOI 10.1097/01.rct.0000167809.89352.93	2005	2	0.105263
Park SJ, 2005, J KOREAN MED SCI, V20, P225, DOI 10.3346/jkms.2005.20.2.225	2005	2	0.105263
Ronchetti R, 2005, PEDIAT ALLERG IMM-UK, V16, P145, DOI 10.1111/j.1399-3038.2005.00244.x	2005	2	0.105263
Schmidt SM, 2005, PEDIATR ALLERGY IMMU, V16, P137, DOI 10.1111/j.1399-3038.2005.00229.x	2005	2	0.105263
Semple MG, 2005, J INFECT DIS, V191, P382, DOI 10.1086/426457	2005	2	0.105263
Talbot TR, 2005, NEW ENGL J MED, V352, P2082, DOI 10.1056/NEJMoa044113	2005	2	0.105263
Wark PAB, 2005, J EXP MED, V201, P937, DOI 10.1084/jem.20041901	2005	2	0.105263
Yu J, 2005, J KOREAN MED SCI, V20, P542, DOI 10.3346/jkms.2005.20.4.542	2005	2	0.105263
van Kraaij MGJ, 2005, CLIN INFECT DIS, V40, P662, DOI 10.1086/427801	2005	2	0.105263
HAHN DL, 1995, J FAM PRACTICE, V41, P345	1995	3	0.103448
GRAYSTON JT, 1994, PEDIATR INFECT DIS J, V13, P675, DOI 10.1097/00006454-199408000-00001	1994	3	0.1
LUNDOLSEN I, 1994, ACTA PAEDIATR, V83, P1143	1994	3	0.1
Awasthi S, 2004, BMJ-BRIT MED J, V328, P791	2004	2	0.1
Biscione GL, 2004, EUR RESPIR J, V24, P745, DOI 10.1183/09031936.04.00049004	2004	2	0.1
Candler PM, 2004, PEDIATR NEUROL, V31, P133, DOI 10.1016/j.pediatrneurol.2004.02.011	2004	2	0.1
Chu HW, 2004, J INFECT DIS, V189, P1119, DOI 10.1086/382050	2004	2	0.1
Drasbek M, 2004, BMC MICROBIOL, V4, P0, DOI 10.1186/1471-2180-4-7	2004	2	0.1
Hansbro PM, 2004, PHARMACOL THERAPEUT, V101, P193, DOI 10.1016/j.pharmthera.2003.10.007	2004	2	0.1
Henrickson KJ, 2004, PEDIATR INFECT DIS J, V23, PS11, DOI 10.1097/01.inf.0000108188.37237.48	2004	2	0.1
Ishida Y, 2004, PEDIATR INT, V46, P174, DOI 10.1046/j.1442-200x.2004.01878.x	2004	2	0.1
Jartti T, 2004, J MED VIROL, V72, P695, DOI 10.1002/jmv.20027	2004	2	0.1
Jennings LC, 2004, PEDIATR INFECT DIS J, V23, P1003, DOI 10.1097/01.inf.0000143648.04673.6c	2004	2	0.1
Korppi M, 2004, PEDIATR INFECT DIS J, V23, P995, DOI 10.1097/01.inf.0000143642.72480.53	2004	2	0.1
Kostadima E, 2004, EUR RESPIR J, V23, P714, DOI 10.1183/09031936.04.00118404	2004	2	0.1
Madhi SA, 2004, NAT MED, V10, P811, DOI 10.1038/nm1077	2004	2	0.1
Maertzdorf J, 2004, J CLIN MICROBIOL, V42, P981, DOI 10.1128/JCM.42.3.981-986.2004	2004	2	0.1
Maltezou HC, 2004, SCAND J INFECT DIS, V36, P639, DOI 10.1080/00365540410020884	2004	2	0.1
Mejias A, 2004, PEDIATR INFECT DIS J, V23, P1, DOI 10.1097/01.inf.0000105103.60288.0e	2004	2	0.1
Miyashita N, 2004, RESP MED, V98, P542, DOI 10.1016/j.rmed.2003.11.012	2004	2	0.1
Muller N, 2004, PSYCHIAT RES, V129, P119, DOI 10.1016/j.psychres.2004.04.009	2004	2	0.1
Rennels MB, 2004, PEDIATRICS, V113, P1441, DOI 10.1542/peds.113.5.1441	2004	2	0.1
Serafino RL, 2004, ANN TROP PAEDIATR, V24, P213, DOI 10.1179/027249304225018957	2004	2	0.1
Van den Hoogen BG, 2004, PEDIATR INFECT DIS J, V23, PS25, DOI 10.1097/01.inf.0000108190.09824.e8	2004	2	0.1
Wang RS, 2004, PEDIATR INFECT DIS J, V23, P564, DOI 10.1097/01.inf.0000130074.56368.4b	2004	2	0.1
Weinberger M, 2004, DRUG DISCOV TODAY, V9, P831, DOI 10.1016/S1359-6446(04)03239-8	2004	2	0.1
de Andrade ALSS, 2004, INT J EPIDEMIOL, V33, P173, DOI 10.1093/ije/dyh025	2004	2	0.1
Chu HW, 2003, INFECT IMMUN, V71, P1520, DOI 10.1128/IAI.71.3.1520-1526.2003	2003	2	0.0952381
Esper F, 2003, PEDIATRICS, V111, P1407, DOI 10.1542/peds.111.6.1407	2003	2	0.0952381
Gern JE, 2003, PEDIATR CLIN N AM, V50, P555, DOI 10.1016/S0031-3955(03)00040-3	2003	2	0.0952381
Heim A, 2003, J MED VIROL, V70, P228, DOI 10.1002/jmv.10382	2003	2	0.0952381
Ison MG, 2003, CLIN INFECT DIS, V36, P1139, DOI 10.1086/374340	2003	2	0.0952381
Korppi Matti, 2003, PAEDIATR DRUGS, V5, P821, DOI 10.2165/00148581-200305120-00005	2003	2	0.0952381
Lemanske RF, 2003, J PEDIATR-US, V142, PS3, DOI 10.1067/mpd.2003.19	2003	2	0.0952381
Loens K, 2003, J CLIN MICROBIOL, V41, P4448, DOI 10.1128/JCM.41.9.4448-4450.2003	2003	2	0.0952381
Mandell LA, 2003, CLIN INFECT DIS, V37, P1405, DOI 10.1086/380488	2003	2	0.0952381
Rawlinson WD, 2003, J INFECT DIS, V187, P1314, DOI 10.1086/368411	2003	2	0.0952381
Antachopoulos C, 2002, J CHILD NEUROL, V17, P55, DOI 10.1177/088307380201700115	2002	2	0.0909091
Bjorn Anne-Mette Bay, 2002, UGESKR LAEGER, V164, P1805	2002	2	0.0909091
Black SB, 2002, PEDIATR INFECT DIS J, V21, P810, DOI 10.1097/00006454-200209000-00005	2002	2	0.0909091
Blasi F, 2002, THORAX, V57, P672, DOI 10.1136/thorax.57.8.672	2002	2	0.0909091
Bosnak M, 2002, PEDIATR INT, V44, P510, DOI 10.1046/j.1442-200X.2002.01606.x	2002	2	0.0909091
Brouard J, 2002, ARCH PEDIATRIE, V9, P365S, DOI 10.1016/S0929-693X(02)00145-8	2002	2	0.0909091
Carpenter TC, 2002, CRIT CARE MED, V30, P925, DOI 10.1097/00003246-200204000-00037	2002	2	0.0909091
Daxboeck F, 2002, SCAND J INFECT DIS, V34, P577, DOI 10.1080/00365540110089836	2002	2	0.0909091
Esposito S, 2002, CLIN INFECT DIS, V35, P1345, DOI 10.1086/344191	2002	2	0.0909091
Green C, 2002, PEDIATR NEUROL, V26, P318, DOI 10.1016/S0887-8994(01)00396-4	2002	2	0.0909091
Hazir T, 2002, LANCET, V360, P835	2002	2	0.0909091
Jartti T, 2002, LANCET, V360, P1393, DOI 10.1016/S0140-6736(02)11391-2	2002	2	0.0909091
Korppi M, 2002, APMIS, V110, P515, DOI 10.1034/j.1600-0463.2002.11007801.x	2002	2	0.0909091
Marodi L, 2002, CLIN EXP IMMUNOL, V128, P1, DOI 10.1046/j.1365-2249.2002.01873.x	2002	2	0.0909091
Michelow IC, 2002, CLIN INFECT DIS, V34, PE1, DOI 10.1086/324358	2002	2	0.0909091
NELSON B, 2002, NETW MAG, V17, P10	2002	2	0.0909091
Ovetchkine P, 2002, SCAND J INFECT DIS, V34, P307, DOI 10.1080/00365540110077452	2002	2	0.0909091
Papadopoulos NG, 2002, AM J RESP CRIT CARE, V165, P1285, DOI 10.1164/rccm.200112-118BC	2002	2	0.0909091
Papadopoulos NG, 2002, THORAX, V57, P328, DOI 10.1136/thorax.57.4.328	2002	2	0.0909091
Virkki R, 2002, THORAX, V57, P438, DOI 10.1136/thorax.57.5.438	2002	2	0.0909091
Wark PAB, 2002, EUR RESPIR J, V19, P68, DOI 10.1183/09031936.02.00226302	2002	2	0.0909091
van Elden LJR, 2002, CLIN INFECT DIS, V34, P177, DOI 10.1086/338238	2002	2	0.0909091
von Hertzen L, 2002, SCAND J INFECT DIS, V34, P22, DOI 10.1080/00365540110077155	2002	2	0.0909091
Bochud PY, 2001, MEDICINE, V80, P75, DOI 10.1097/00005792-200103000-00001	2001	2	0.0869565
Bruch LA, 2001, PEDIATR NEUROL, V25, P67, DOI 10.1016/S0887-8994(01)00274-0	2001	2	0.0869565
Eskola J, 2001, NEW ENGL J MED, V344, P403, DOI 10.1056/NEJM200102083440602	2001	2	0.0869565
Hardy RD, 2001, INFECT IMMUN, V69, P3869, DOI 10.1128/IAI.69.6.3869-3876.2001	2001	2	0.0869565
Hyde TB, 2001, J INFECT DIS, V183, P907, DOI 10.1086/319258	2001	2	0.0869565
Hyde TB, 2001, JAMA-J AM MED ASSOC, V286, P1857, DOI 10.1001/jama.286.15.1857	2001	2	0.0869565
Hynson JL, 2001, NEUROLOGY, V56, P1308, DOI 10.1212/WNL.56.10.1308	2001	2	0.0869565
Kusunoki S, 2001, NEUROLOGY, V57, P736, DOI 10.1212/WNL.57.4.736	2001	2	0.0869565
McDonald WI, 2001, ANN NEUROL, V50, P121, DOI 10.1002/ana.1032	2001	2	0.0869565
Mezarina KB, 2001, JAMA-J AM MED ASSOC, V285, P2073	2001	2	0.0869565
Miyashita N, 2001, CHEST, V119, P1416, DOI 10.1378/chest.119.5.1416	2001	2	0.0869565
Narita M, 2001, CLIN DIAGN LAB IMMUN, V8, P1028, DOI 10.1128/CDLI.8.5.1028-1030.2001	2001	2	0.0869565
Narita M, 2001, J INFECTION, V42, P154, DOI 10.1053/jinf.2000.0769	2001	2	0.0869565
Schmidt SM, 2001, PEDIAT ALLERG IMM-UK, V12, P257, DOI 10.1034/j.1399-3038.2001.00042.x	2001	2	0.0869565
Schwarz S, 2001, NEUROLOGY, V56, P1313, DOI 10.1212/WNL.56.10.1313	2001	2	0.0869565
Waites KB., 2001, LAB DIAGNOSIS MYCOPL, V0, P0	2001	2	0.0869565
Wang JN, 2001, ACTA PAEDIATR, V90, P594, DOI 10.1111/j.1651-2227.2001.tb00810.x	2001	2	0.0869565
Yang YG, 2001, PEDIATR INFECT DIS J, V20, P52, DOI 10.1097/00006454-200101000-00010	2001	2	0.0869565
Bencina D, 2000, EUR J CLIN MICROBIOL, V19, P521, DOI 10.1007/s100960000303	2000	2	0.0833333
Birkebaek NH, 2000, EUR RESPIR J, V16, P108, DOI 10.1034/j.1399-3003.2000.16a19.x	2000	2	0.0833333
Black S, 2000, PEDIATR INFECT DIS J, V19, P187, DOI 10.1097/00006454-200003000-00003	2000	2	0.0833333
Castro M, 2000, AM J RESP CELL MOL, V22, P143, DOI 10.1165/ajrcmb.22.2.f174	2000	2	0.0833333
Chu HW, 2000, J ALLERGY CLIN IMMUN, V106, P713, DOI 10.1067/mai.2000.109829	2000	2	0.0833333
Clements H, 2000, ARCH DIS CHILD, V83, P320, DOI 10.1136/adc.83.4.320	2000	2	0.0833333
Dale RC, 2000, BRAIN, V123, P2407, DOI 10.1093/brain/123.12.2407	2000	2	0.0833333
Duffy LB, 2000, J ANTIMICROB CHEMOTH, V45, P29, DOI 10.1093/jac/45.suppl, 3.29	2000	2	0.0833333
Hammerschlag MR, 2000, ANTIMICROB AGENTS CH, V44, P1409, DOI 10.1128/AAC.44.5.1409-1409.2000	2000	2	0.0833333
Hammerschlag MR, 2000, INT J ANTIMICROB AG, V15, P149, DOI 10.1016/S0924-8579(00)00157-6	2000	2	0.0833333
Hammerschlag, 2000, CURR INFECT DIS REP, V2, P115, DOI 10.1007/s11908-000-0023-y	2000	2	0.0833333
Hannan PCT, 2000, J ANTIMICROB CHEMOTH, V45, P367, DOI 10.1093/jac/45.3.367	2000	2	0.0833333
Heffelfinger JD, 2000, ARCH INTERN MED, V160, P1399, DOI 10.1001/archinte.160.10.1399	2000	2	0.0833333
Marc E, 2000, PEDIATR INFECT DIS J, V19, P706, DOI 10.1097/00006454-200008000-00007	2000	2	0.0833333
McCracken GH, 2000, PEDIATR INFECT DIS J, V19, P373, DOI 10.1097/00006454-200004000-00032	2000	2	0.0833333
McCracken GH, 2000, PEDIATR INFECT DIS J, V19, P924, DOI 10.1097/00006454-200009000-00036	2000	2	0.0833333
Nelson JD, 2000, PEDIATR INFECT DIS J, V19, P251, DOI 10.1097/00006454-200003000-00016	2000	2	0.0833333
Papadopoulos NG, 2000, J INFECT DIS, V181, P1875, DOI 10.1086/315513	2000	2	0.0833333
Radisic M, 2000, CLIN INFECT DIS, V31, P1507, DOI 10.1086/317498	2000	2	0.0833333
Smith R, 2000, CLIN PEDIATR, V39, P195, DOI 10.1177/000992280003900401	2000	2	0.0833333
Toikka P, 2000, ARCH DIS CHILD, V83, P413, DOI 10.1136/adc.83.5.413	2000	2	0.0833333
Tuuminen T, 2000, CLIN DIAGN LAB IMMUN, V7, P734, DOI 10.1128/CDLI.7.5.734-738.2000	2000	2	0.0833333
Vichinsky EP, 2000, NEW ENGL J MED, V342, P1855, DOI 10.1056/NEJM200006223422502	2000	2	0.0833333
Zambrino CA, 2000, MOVEMENT DISORD, V15, P1023, DOI 10.1002/1531-8257(200009)15:5<1023::AID-MDS1045>3.0.CO;2-A	2000	2	0.0833333
Bachur R, 1999, ANN EMERG MED, V33, P166, DOI 10.1016/S0196-0644(99)70390-2	1999	2	0.08
Blasi F, 1999, J INFECT DIS, V180, P2074, DOI 10.1086/315126	1999	2	0.08
Boman J, 1999, J CLIN MICROBIOL, V37, P3791, DOI 10.1128/JCM.37.12.3791-3799.1999	1999	2	0.08
Chan ED, 1999, CHEST, V115, P1188, DOI 10.1378/chest.115.4.1188	1999	2	0.08
Corsaro D, 1999, DIAGN MICR INFEC DIS, V35, P105, DOI 10.1016/S0732-8893(99)00070-X	1999	2	0.08
Deeks SL, 1999, PEDIATRICS, V103, P409, DOI 10.1542/peds.103.2.409	1999	2	0.08
Duffy MF, 1999, J CLIN MICROBIOL, V37, P1024, DOI 10.1128/JCM.37.4.1024-1029.1999	1999	2	0.08
Feikin DR, 1999, CLIN INFECT DIS, V29, P1545, DOI 10.1086/313500	1999	2	0.08
Fost DA, 1999, J ALLERGY CLIN IMMUN, V103, P1031, DOI 10.1016/S0091-6749(99)70175-2	1999	2	0.08
Hallander HO, 1999, SCAND J INFECT DIS, V31, P281, DOI 10.1080/00365549950163581	1999	2	0.08
Huang CC, 1999, NEW ENGL J MED, V341, P936, DOI 10.1056/NEJM199909233411302	1999	2	0.08
Keegan BM, 1999, PEDIATR NEUROL, V21, P822, DOI 10.1016/S0887-8994(99)00087-9	1999	2	0.08
Kohyama T, 1999, ANTIMICROB AGENTS CH, V43, P907, DOI 10.1128/AAC.43.4.907	1999	2	0.08
Korppi M, 1999, PEDIATR PULM, V0, P110	1999	2	0.08
Kraft M, 1999, AM J RESP CRIT CARE, V159, P0	1999	2	0.08
Moola S, 1999, CHEST, V116, P974, DOI 10.1378/chest.116.4.974	1999	2	0.08
Ruuskanen O, 1999, SEMIN RESPIR INFECT, V14, P163	1999	2	0.08
Stuve O, 1999, CURR OPIN NEUROL, V12, P395, DOI 10.1097/00019052-199908000-00005	1999	2	0.08
Wei TY, 1999, PEDIATR NEUROL, V21, P503, DOI 10.1016/S0887-8994(99)00028-4	1999	2	0.08
Abele-Horn M, 1998, CLIN INFECT DIS, V26, P909, DOI 10.1086/513919	1998	2	0.0769231
Cook PJ, 1998, THORAX, V53, P254, DOI 10.1136/thx.53.4.254	1998	2	0.0769231
Hall MC, 1998, J CHILD NEUROL, V13, P354, DOI 10.1177/088307389801300711	1998	2	0.0769231
Hauksdottir GS, 1998, SCAND J INFECT DIS, V30, P177, DOI 10.1080/003655498750003591	1998	2	0.0769231
Ieven M, 1998, CLIN INFECT DIS, V27, P1552, DOI 10.1086/517753	1998	2	0.0769231
Klausner JD, 1998, J INFECT DIS, V177, P161, DOI 10.1086/513818	1998	2	0.0769231
Komatsu H, 1998, PEDIATR NEUROL, V18, P160, DOI 10.1016/S0887-8994(97)00138-0	1998	2	0.0769231
Makela MJ, 1998, J CLIN MICROBIOL, V36, P539	1998	2	0.0769231
Roblin PM, 1998, ANTIMICROB AGENTS CH, V42, P194, DOI 10.1128/AAC.42.1.194	1998	2	0.0769231
Tan TQ, 1998, PEDIATRICS, V102, P1369, DOI 10.1542/peds.102.6.1369	1998	2	0.0769231
van Westrhenen R, 1998, NEPHROL DIAL TRANSPL, V13, P3208, DOI 10.1093/ndt/13.12.3208	1998	2	0.0769231
Boman J, 1997, J INFECT DIS, V175, P1523, DOI 10.1086/516492	1997	2	0.0740741
Drews AL, 1997, CLIN INFECT DIS, V25, P1421, DOI 10.1086/516137	1997	2	0.0740741
Jadavji T, 1997, CAN MED ASSOC J, V156, P0	1997	2	0.0740741
Johnston SL, 1997, PEDIATR PULM, V0, P88	1997	2	0.0740741
Kessler HH, 1997, J CLIN MICROBIOL, V35, P1592, DOI 10.1128/JCM.35.6.1592-1594.1997	1997	2	0.0740741
Korppi M, 1997, EUR RESPIR J, V10, P1125, DOI 10.1183/09031936.97.10051125	1997	2	0.0740741
Saikku Pekka, 1997, CLIN MICROBIOL INFECT, V3, P599, DOI 10.1111/j.1469-0691.1997.tb00464.x	1997	2	0.0740741
Seppala H, 1997, NEW ENGL J MED, V337, P441, DOI 10.1056/NEJM199708143370701	1997	2	0.0740741
Tarlow MJ, 1997, PEDIATR INFECT DIS J, V16, P457, DOI 10.1097/00006454-199704000-00030	1997	2	0.0740741
Lieberman D, 1996, RESPIRATION, V63, P261	1996	2	0.0714286
Tay YK, 1996, J AM ACAD DERMATOL, V35, P757, DOI 10.1016/S0190-9622(96)90732-X	1996	2	0.0714286
BARTLETT JG, 1995, NEW ENGL J MED, V333, P1618, DOI 10.1056/NEJM199512143332408	1995	2	0.0689655
EMRE U, 1995, J INFECT DIS, V172, P265, DOI 10.1093/infdis/172.1.265	1995	2	0.0689655
HYMAN CL, 1995, CLIN INFECT DIS, V20, P1174, DOI 10.1093/clinids/20.5.1174	1995	2	0.0689655
KIM JS, 1995, MOVEMENT DISORD, V10, P510, DOI 10.1002/mds.870100419	1995	2	0.0689655
KUO CC, 1995, CLIN MICROBIOL REV, V8, P451, DOI 10.1128/CMR.8.4.451	1995	2	0.0689655
EMRE U, 1994, ARCH PEDIAT ADOL MED, V148, P727, DOI 10.1001/archpedi.1994.02170070065013	1994	2	0.0666667
*CLIN LAB STAND I, 2008, M100S18 CLIN LAB S S, V0, P0	2008	1	0.0625
Adcock IM, 2008, LANCET, V372, P1073, DOI 10.1016/S0140-6736(08)61449-X	2008	1	0.0625
Ahmed A, 2008, PEDIATR INFECT DIS J, V27, P459, DOI 10.1097/INF.0b013e3181646d82	2008	1	0.0625
*COMM PRACT GUID B, 2007, PRACT GUID BACT MEN, V0, P0	2007	1	0.0588235
ALEXANDER NE, 2007, 45 INF DIS SOC AM AN, V0, P0	2007	1	0.0588235
*SLON EP CTR, 2006, PATT MED US US, V0, P0	2006	1	0.0555556
ABUKAWA D, 2006, TODAYS THERAPY PEDIA, V0, P362	2006	1	0.0555556
*JAP SOC ALL CLIN, 2005, JAP PED GUID TREAT M, V0, P0	2005	1	0.0526316
*WHO, 2005, STAT ART NEW VACC RE, V0, P0	2005	1	0.0526316
Adderley-Kelly Beatrice, 2005, ABNF J, V16, P52	2005	1	0.0526316
Ahmadiafshar Akefeh, 2005, IRAN J ALLERGY ASTHMA IMMUNOL, V4, P185	2005	1	0.0526316
Aittoniemi J, 2005, CLIN EXP IMMUNOL, V142, P120, DOI 10.1111/j.1365-2249.2005.02881.x	2005	1	0.0526316
Agrawal S, 2004, NAT BIOTECHNOL, V22, P1533, DOI 10.1038/nbt1042	2004	1	0.05
*CDCP, 2002, MMWR-MORBID MORTAL W, V50, P1153	2002	1	0.0454545
AITES KB, 2002, MANUAL COMMERCIAL ME, V0, P201	2002	1	0.0454545
*TAP PHARM INC, 2001, SPECTR CEFD PACK INS, V0, P0	2001	1	0.0434783
Abele-Horn M, 2001, EUR J CLIN MICROBIOL, V20, P263, DOI 10.1007/PL00011262	2001	1	0.0434783
Adams RJ, 2001, ARCH NEUROL-CHICAGO, V58, P565, DOI 10.1001/archneur.58.4.565	2001	1	0.0434783
Akbas E, 2001, POSTGRAD MED, V109, P135, DOI 10.3810/pgm.2001.05.933	2001	1	0.0434783
Anderson ME, 2001, J PHARMACOL EXP THER, V296, P806	2001	1	0.0434783
*AM AC PED COMM IN, 2000, RED BOOK 2000 REP CO, V0, P0	2000	1	0.0416667
*NAT I CLIN EXC, 2000, GUID US ZAN REL TREA, V0, P0	2000	1	0.0416667
ANDREOTTI D, 2000, CURR OPIN ANTIINFECT, V2, P133	2000	1	0.0416667
Adams RJ, 2000, J CHILD NEUROL, V15, P344, DOI 10.1177/088307380001500511	2000	1	0.0416667
Berger RP, 2000, PEDIATRICS, V105, P433, DOI 10.1542/peds.105.2.433	2000	1	0.0416667
Birch JM, 2000, BRIT J CANCER, V82, P1571, DOI 10.1054/bjoc.1999.1072	2000	1	0.0416667
*ADV COMM IMM PRAC, 1999, MMWR-MORBID MORTAL W, V4, P1	1999	1	0.04
*AGI, 1999, UB SAIS 1998 99, V0, P1	1999	1	0.04
*DEP COMM DIS SURV, 1999, ISR992 WHO DEP COMM, V0, P0	1999	1	0.04
*MIN SAL REP CHIL, 1999, AN EGR HOSP, V0, P6	1999	1	0.04
*NAT COMM CLIN LAB, 1999, M7A3 NAT COMM CLIN L, V0, P0	1999	1	0.04
*NAT CTR HLTH STAT, 1999, NAT HOSP DISCH SURV, V1, P979	1999	1	0.04
*US BUR CENS, 1999, INT EST POP AG SEX R, V0, P0	1999	1	0.04
*US DEP HHS, 1999, DET DAT 1979 96 PUBL, V0, P0	1999	1	0.04
Alsarraf R, 1999, ARCH OTOLARYNGOL, V125, P12, DOI 10.1001/archotol.125.1.12	1999	1	0.04
Alvarez-Elcoro S, 1999, MAYO CLIN PROC, V74, P613, DOI 10.4065/74.6.613	1999	1	0.04
Amsden GW, 1999, J ANTIMICROB CHEMOTH, V44, P1, DOI 10.1093/jac/44.1.1	1999	1	0.04
Andeweg AC, 1999, J CLIN MICROBIOL, V37, P524, DOI 10.1128/JCM.37.3.524-530.1999	1999	1	0.04
Anezaki T, 1999, RINSHO SHINKEIGAKU, V39, P821	1999	1	0.04
BERNER R, 1999, ESPID 99, V0, P49	1999	1	0.04
BESTEBROER TM, 1999, 245607005 RIVM, V0, P0	1999	1	0.04
*BRIT PAED SUR UN, 1998, 12 ANN REP 1997 1998, V0, P0	1998	1	0.0384615
*NAT COMM CLIN LAB, 1998, PERF STAND ANT SUSC, V18, P0	1998	1	0.0384615
*SEL COMM SCI TECH, 1998, KL811 SEL COMM SCI T, V0, P0	1998	1	0.0384615
*STAND MED ADV COM, 1998, PATH LEAST RES, V0, P0	1998	1	0.0384615
*STAT NZ, 1998, NZ OFF YB 1998, V0, P0	1998	1	0.0384615
ARANDA C, 1998, SERIE HCT AIEPI 3E, V1, P43	1998	1	0.0384615
Afzal MA, 1998, LANCET, V351, P646, DOI 10.1016/S0140-6736(05)78429-4	1998	1	0.0384615
Al Rashed A, 1998, ANN TROP MED PARASIT, V92, P595, DOI 10.1080/00034989859294	1998	1	0.0384615
Anttila TI, 1998, BRIT J HAEMATOL, V103, P150	1998	1	0.0384615
Barbaud A, 1998, ANN DERMATOL VENER, V125, P799	1998	1	0.0384615
Bartlett JG, 1998, CLIN INFECT DIS, V26, P811, DOI 10.1086/513953	1998	1	0.0384615
Belshe RB, 1998, NEW ENGL J MED, V338, P1405, DOI 10.1056/NEJM199805143382002	1998	1	0.0384615
Benador N, 1998, PEDIATRICS, V102, P1422, DOI 10.1542/peds.102.6.1422	1998	1	0.0384615
*NAT ASTHM ED PREV, 1997, NIH PUBL, V0, P116	1997	1	0.037037
*NAT COMM CLIN LAB, 1997, M2A6 NCCLS, V0, P0	1997	1	0.037037
Adcock PM, 1997, PEDIATR INFECT DIS J, V16, P842, DOI 10.1097/00006454-199709000-00005	1997	1	0.037037
Aebi C, 1997, J PEDIATR-US, V130, P612, DOI 10.1016/S0022-3476(97)70246-4	1997	1	0.037037
Ahonen A, 1997, J ANTIMICROB CHEMOTH, V39, P499, DOI 10.1093/jac/39.4.499	1997	1	0.037037
Armstrong DS, 1997, AM J RESP CRIT CARE, V156, P1197, DOI 10.1164/ajrccm.156.4.96-11058	1997	1	0.037037
Baty V, 1997, SCAND J INFECT DIS, V29, P319, DOI 10.3109/00365549709019054	1997	1	0.037037
Chiou CC, 1997, PEDIATR INFECT DIS J, V16, P327, DOI 10.1097/00006454-199703000-00015	1997	1	0.037037
AbeleHorn M, 1996, EUR J CLIN MICROBIOL, V15, P595, DOI 10.1007/BF01709369	1996	1	0.0357143
Annunziato P W, 1996, PEDIATR REV, V17, P415	1996	1	0.0357143
BLACK PN, 1996, EUR RESPIR REV, V6, P240	1996	1	0.0357143
BOWLES N, 1996, NEWSLETTER SCI COUNC, V11, P4	1996	1	0.0357143
Bebear C, 1996, MOL DIAGNOSTIC PROCE, VII, P189	1996	1	0.0357143
CASSELL GH, 1996, MOL DIAGNOSTIC PROCE, V2, P123	1996	1	0.0357143
Cosentini R, 1996, RESPIRATION, V63, P61	1996	1	0.0357143
Cunha BA, 1996, POSTGRAD MED, V99, P123	1996	1	0.0357143
DORIGOZETSMA JW, 1996, IOM LETT, V4, P308	1996	1	0.0357143
Dalhoff K, 1996, CHEST, V110, P351, DOI 10.1378/chest.110.2.351	1996	1	0.0357143
Diehl JL, 1996, EUR RESPIR J, V9, P1320, DOI 10.1183/09031936.96.09061320	1996	1	0.0357143
DorigoZetsma JW, 1996, J CLIN MICROBIOL, V34, P3249, DOI 10.1128/JCM.34.12.3249-3250.1996	1996	1	0.0357143
*CYT SOFTW, 1995, STATX 3 WIND US MAN, V0, P0	1995	1	0.0344828
ASSIER H, 1995, ARCH DERMATOL, V131, P539, DOI 10.1001/archderm.131.5.539	1995	1	0.0344828
BAER M, 1995, LANCET, V345, P661, DOI 10.1016/S0140-6736(95)90570-7	1995	1	0.0344828
Buck GE, 1995, PEDIATR PULM, V20, P297, DOI 10.1002/ppul.1950200507	1995	1	0.0344828
CIMOLAI N, 1995, CLIN INFECT DIS, V21, P1182, DOI 10.1093/clinids/21.5.1182	1995	1	0.0344828
DUPONT HT, 1995, CLIN INFECT DIS, V21, P1126, DOI 10.1093/clinids/21.5.1126	1995	1	0.0344828
ANDREWS PA, 1994, NEPHROL DIAL TRANSPL, V9, P564, DOI 10.1093/ndt/9.5.564	1994	1	0.0333333
BENYAAKOV M, 1994, J CLIN PATHOL, V47, P232, DOI 10.1136/jcp.47.3.232	1994	1	0.0333333
BLAI F, 1994, EUR RESPIR J, V7, P102	1994	1	0.0333333
BLARI F, 1994, CHEST, V105, P812	1994	1	0.0333333
CIMOLAI N, 1994, J NEUROL NEUROSUR PS, V57, P638, DOI 10.1136/jnnp.57.5.638	1994	1	0.0333333
DORIN JR, 1994, CYSTIC FIBROSIS CURR, V2, P3	1994	1	0.0333333
Cited references	Year	Count
